# Supplementary material for: Tunable circularly polarized luminescence of D–A type chiral conjugated oligomers via achiral donors
Source: Royal Society of Chemistry journal article supplement (doi:10.1039/d4py01192a), 2024-12-11
Supplement: d4py01192a1.pdf [file d4py01192a1.pdf]

Supporting Information for  
Tunable circularly polarized luminescence of D-A type chiral  
conjugated oligomers via achiral donors

Yuxiang Wang,<sup>a\*</sup> Yabin Feng,<sup>a</sup> Qian Wang<sup>a</sup> and Qi Meng<sup>a\*</sup>

<sup>a</sup>School of Petrochemical Engineering, Changzhou University, Jiangsu Key Laboratory of Advanced Catalytic Materials and Technology, Changzhou, Jiangsu 213164, P. R. China; Email: wangyx@cczu.edu.cn; mengqi@cczu.edu.cn

# Table of Contents

1. Measurements and sample Preparation
2. Synthesis procedures of the M2
3. Synthesis procedures of the chiral conjugated oligomers
4. TGA curves of the chiral conjugated oligomers
5. Photophysical Properties of the chiral conjugated oligomers
6. Chiroptical properties of the chiral conjugated oligomers
7. NMR and HRMS Spectra of all new compounds
8. References

## 1. Measurements and sample Preparation

Nuclear magnetic resonance (NMR) spectra were recorded on 300 or 400 MHz Bruker spectrometer. High-resolution mass spectrometry (HRMS) data were recorded on Agilent 6540 QTOF LC/MS analyzer. Gel permeation chromatography (GPC) data were tested in Waters Breeze GPC analyzer. Ultraviolet-visible (UV-*vis*) spectra were recorded on Shimadzu UV-1700 UV-*vis* spectrophotometer. Emission spectra were performed on Agilent Cary Eclipse spectrophotometer. The transient photoluminescence (PL) decay spectra and absolute PL quantum yield were determined by Edinburgh FS5 Fluorescence Spectrometer. Circular dichroism (CD) spectra were measured from a JASCO J-810 spectropolarimeter. CPL spectra were measured from a JASCO CPL-300 spectrofluoropolarimeter. Thermogravimetric analysis (TGA) was performed by using a SETARAM TG Labsys Evo under N<sub>2</sub> atmosphere. Cyclic voltammetry (CV) was measured on a CHI920C (Shanghai CH Instrument Company, China) electrochemical workstation in CH<sub>2</sub>Cl<sub>2</sub> solution at room temperature under N<sub>2</sub> atmosphere, with TBAPF<sub>6</sub> (0.1 M) as supporting electrolyte and a Hg/Hg<sub>2</sub>Cl<sub>2</sub> electrode as a reference electrode.

**Solution Sample Preparation:** A suitable quantity of the oligomer was weighed and dissolved in 3 mL of toluene to form a stock solution with a concentration of  $1.0 \times 10^{-3}$  mol/L. Subsequently, 30  $\mu$ L of the stock solution was taken and diluted to 3 mL with toluene, resulting in a sample solution with a concentration of  $1.0 \times 10^{-5}$  mol/L.

**PMMA Doped Film Preparation:** 1.98 g of PMMA was weighed and dissolved in 100 mL of toluene, with stirring maintained at 100°C for 1.5 hours. 1 mg of the oligomer was introduced into a sample vial, followed by the addition of 5 mL of the PMMA toluene solution. The mixture was then filtered using a 0.22  $\mu$ m microporous membrane to prepare a doped solution with oligomer to PMMA mass ratio of 1:99. 70  $\mu$ L of the doped solution was drop-casted onto a 1 cm  $\times$  4 cm quartz glass plate, and then transferred to a heating pan and heated at 110°C for 5 hours to yield a PMMA doped film with a mass concentration of 1wt%.

**S-BINOL-CH<sub>2</sub> Doped Film Preparation:** The oligomer solution and S-BINOL-CH<sub>2</sub> solution, each with mass concentration of 20 mg/mL in toluene, were prepared. 95  $\mu$ L

of the oligomer solution and 5  $\mu\text{L}$  of the *S*-BINOL-CH<sub>2</sub> solution were mixed and filtered with a 0.22  $\mu\text{m}$  microporous membrane to yield a doped solution with oligomer to *S*-BINOL-CH<sub>2</sub> mass ratio of 95:5. 50  $\mu\text{L}$  of the doped solution was spin-coated onto a 1 cm  $\times$  4 cm quartz glass plate, with rotate speed at 500 rpm for 18 seconds, followed by 1000 rpm for 20 seconds using a spin coater. Then the spin-coated film was transferred to a heating pan and heated at 150°C for 5 hours to obtain an *S*-BINOL-CH<sub>2</sub> doped film with a mass concentration of 5%.

**Pure Thin Film Preparation:** The oligomer toluene solution with a mass concentration of 20 mg/mL was prepared and filtered using a 0.22  $\mu\text{m}$  microporous membrane. 50  $\mu\text{L}$  of the sample solution was spin-coated onto a 1 cm  $\times$  4 cm quartz glass plate, with rotate speed at 500 rpm for 18 seconds, followed by 1000 rpm for 20 seconds using a spin coater. Then the spin-coated film was transferred to a heating pan and heated at 150°C for 5 hours to yield a pure thin film.

## 2. Synthesis procedures of the M2

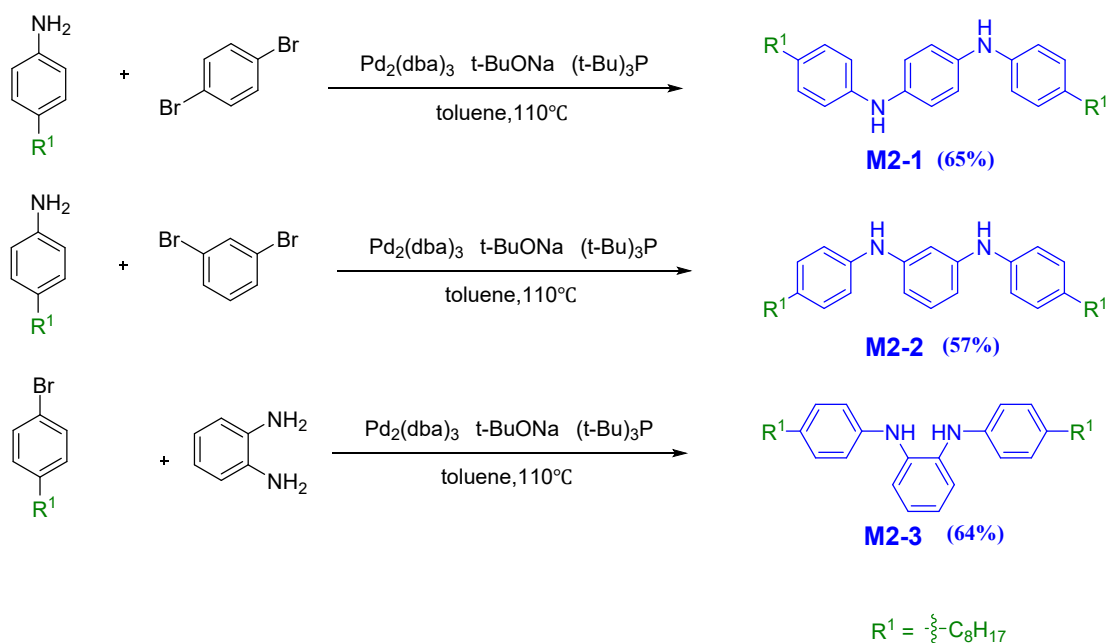

**Scheme S1.** The Synthesis procedures of M2-1, M2-2 and M2-3.

### Synthesis of M2-1:

4-n-Octylaniline (600.0 mg, 2.92 mmol), 1,4-Dibromobenzene (328.2 mg, 1.39 mmol), Pd<sub>2</sub>(dba)<sub>3</sub> (38.2 mg, 41.74 μmol), Tri-tert-butylphosphine tetrafluoroborate (28.2 mg mmol, 139.14 μmol), and NaOtBu (401.2 mg, 4.17 mmol) in dry toluene (10 mL) were heated to 110 °C in an oven dried Schlenk flask under N<sub>2</sub> atmosphere for 18 hours. After cooling to room temperature, the reaction mixture was quenched with water and extracted with ethyl acetate. The organic phase was dried with anhydrous Na<sub>2</sub>SO<sub>4</sub> and the solvent was evaporated. The reaction mixture was purified by column chromatography (petroleum ether/dichloromethane = 2:1) to afford **M2-1** (443.0 mg, 65%) as white powder. <sup>1</sup>H NMR (300 MHz, Benzene-*d*<sub>6</sub>) δ 7.09-7.01 (m, 4H), 6.88 (d, *J* = 7.2 Hz, 8H), 4.92 (s, 2H), 2.54 (t, *J* = 7.6 Hz, 4H), 1.61 (p, *J* = 7.3 Hz, 4H), 1.38-1.18 (m, 21H), 0.91 (t, *J* = 6.6 Hz, 6H).<sup>1</sup>

### Synthesis of M2-2:

Prepared according to same procedure of **M2-1**, 389.0 mg white powder, yield: 57%. <sup>1</sup>H NMR (300 MHz, DMSO-*d*<sub>6</sub>) δ 7.90 (s, 2H), 7.00 (q, *J* = 8.3 Hz, 9H), 6.74 (s, 1H), 6.43 (dd, *J* = 8.0, 2.1 Hz, 2H), 1.51 (t, *J* = 7.5 Hz, 4H), 1.40-1.02 (m, 20H), 0.85 (t, *J* = 6.5 Hz, 6H).<sup>1</sup>

### Synthesis of M2-3:

Prepared according to same procedure of **M2-1**, 436.0 mg white powder, yield: 64%. <sup>1</sup>H NMR (300 MHz, Benzene-*d*<sub>6</sub>) δ 7.25 (dd, *J* = 5.9, 3.6 Hz, 2H), 7.03-6.96 (m, 4H), 6.87 (dd, *J* = 6.0, 3.5 Hz, 2H), 6.82-6.72 (m, 4H), 5.20 (s, 2H), 2.56-2.43 (m, 4H), 1.57 (p, *J* = 7.5 Hz, 4H), 1.35-1.16 (m, 21H), 0.95-0.87 (m, 6H). <sup>13</sup>C NMR (75 MHz, Benzene-*d*<sub>6</sub>) δ 141.93, 135.50, 134.97, 129.21, 122.62, 119.87, 117.75, 35.31, 31.95, 31.83, 29.61, 29.39, 29.33, 22.75, 14.02. HRMS (ESI, *m/z*): calcd for C<sub>34</sub>H<sub>49</sub>N<sub>2</sub> [M+H<sup>+</sup>], 485.3890; found, 485.3892.

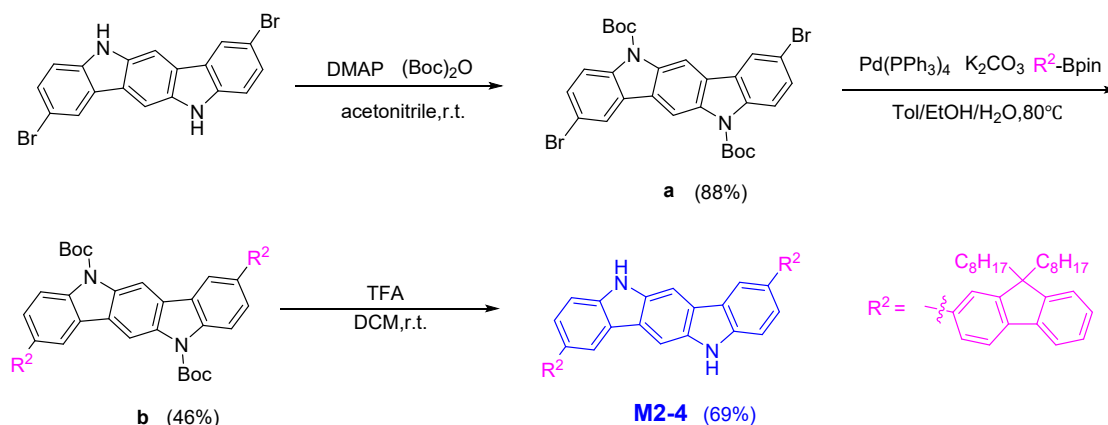

**Scheme S2.** The Synthesis procedures of **M2-4**.

### Synthesis of **a** and **b**:

2,8-dibromo-5,11-dihydro indolo[3,2-b]carbazole (500.0 mg, 1.21 mmol), Di-tert-butyl decarbonate (1.32 g, 6.04 mmol), and 4-Dimethylaminopyridine (295.0 mg, 2.41 mmol) in acetonitrile (25 mL) was stirred for 12 h at room temperature. the reaction mixture was quenched with water and extracted with dichloromethane. After evaporating the solvent under reduced pressure, **a** was submitted to the following reaction without further purification.

**a** (600.0 mg, 976.67  $\mu$ mol), **R<sup>2</sup>-bpin** (1.26 g, 2.44 mmol), Pd(PPh<sub>3</sub>)<sub>4</sub> (56.4 mg, 48.83  $\mu$ mol), K<sub>2</sub>CO<sub>3</sub> (674.9 mg, 4.88 mmol) were dissolved in toluene (12 mL), ethanol (4 mL) and water (4 mL). The reaction mixture was heated to 80 °C in an Schlenk flask under N<sub>2</sub> atmosphere for 12 hours. After cooling to room temperature, the reaction mixture was quenched with water and extracted with ethyl acetate. The organic phase was dried with anhydrous Na<sub>2</sub>SO<sub>4</sub> and the solvent was evaporated. The reaction mixture was purified by column chromatography (petroleum ether/ethyl acetate = 200:1) to afford **b** (564.0 mg, 46%) as white powder. <sup>1</sup>H NMR (400 MHz, Chloroform-*d*)  $\delta$  9.10 (s, 2H), 8.40 (d, *J* = 1.8 Hz, 2H), 8.35 (d, *J* = 8.5 Hz, 2H), 7.89-7.80 (m, 4H), 7.79-7.71 (m, 4H), 7.71 (d, *J* = 1.7 Hz, 2H), 7.45-7.29 (m, 6H), 2.08 (dt, *J* = 11.0, 5.2 Hz, 8H), 1.87 (s, 18H), 1.25-1.01 (m, 42H), 0.80 (t, *J* = 7.0 Hz, 13H).

### Synthesis of **M2-4**:

**b** (564.0 mg, 457.12  $\mu$ mol) in dichloromethane (5 mL), TFA (512.2 mg, 4.57 mmol) was add dropwise to the reaction flask stirred for 12 h at room temperature. the

reaction mixture was quenched with water and extracted with ethyl acetate. The organic phase was dried with anhydrous  $\text{Na}_2\text{SO}_4$  and the solvent was evaporated. The reaction mixture was purified by column chromatography (petroleum ether/ethyl acetate = 200:1) to afford **M2-4** (327.0 mg, 69%) as white powder.  $^1\text{H}$  NMR (400 MHz, Benzene- $d_6$ )  $\delta$  8.69 (d,  $J = 1.7$  Hz, 2H), 8.04 (d,  $J = 1.6$  Hz, 2H), 7.93 (dd,  $J = 8.3, 1.8$  Hz, 2H), 7.88-7.76 (m, 6H), 7.74-7.68 (m, 2H), 7.39-7.33 (m, 2H), 7.32-7.24 (m, 5H), 7.23 (s, 2H), 6.84 (s, 2H), 2.26-2.08 (m, 8H), 1.20-0.98 (m, 48H), 0.82 (t,  $J = 7.0$  Hz, 12H).  $^{13}\text{C}$  NMR (75 MHz, Benzene- $d_6$ )  $\delta$  151.69, 150.99, 142.09, 141.36, 140.61, 139.94, 135.89, 133.15, 125.92, 124.29, 123.84, 122.85, 121.78, 120.34, 119.91, 119.09, 110.80, 100.95, 55.33, 40.76, 31.83, 30.26, 29.33, 29.28, 24.09, 22.65, 13.99.

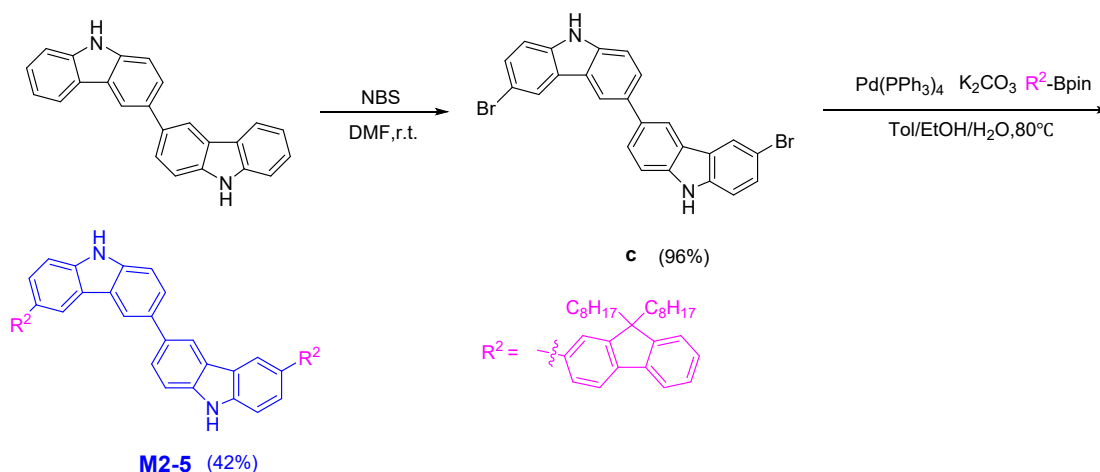

**Scheme S3.** The Synthesis procedures of **M2-5**.

#### Synthesis of **c**:

3,3'-Bicarbazole (400.0 mg, 1.20 mmol) was dissolved in DMF (20 mL). N-Bromosuccinimide (428.4 mg, 2.41 mmol) was slowly added to the reaction flask in an ice bath. After stirred for 12 h at room temperature, the reaction mixture was quenched with water and extracted with ethyl acetate. The organic phase was dried with anhydrous  $\text{Na}_2\text{SO}_4$  and the solvent was evaporated. The reaction mixture was purified by column chromatography (petroleum ether/ethyl acetate = 10:1) to afford **c** (570.0 mg, 96%) as white powder.  $^1\text{H}$  NMR (300 MHz, DMSO- $d_6$ )  $\delta$  11.48 (s, 2H), 8.62 (s, 2H), 8.47 (d,  $J = 1.8$  Hz, 2H), 7.95-7.77 (m, 2H), 7.68-7.43 (m, 6H).<sup>2</sup>

#### Synthesis of **M2-5**:

**c** (400.0 mg, 816.0  $\mu\text{mol}$ ), **R<sup>2</sup>-bpin** (1.05 g, 2.04 mmol), Pd(PPh<sub>3</sub>)<sub>4</sub> (47.2 mg, 40.8  $\mu\text{mol}$ ), and K<sub>2</sub>CO<sub>3</sub> (563.9 mg, 4.08 mmol) were dissolved in toluene (12 mL), ethanol (4 mL) and water (4 mL). The reaction mixture was heated to 80 °C in an Schlenk flask under N<sub>2</sub> atmosphere for 12 hours. After cooling to room temperature, the reaction mixture was quenched with water and extracted with ethyl acetate. The organic phase was dried with anhydrous Na<sub>2</sub>SO<sub>4</sub> and the solvent was evaporated. The reaction mixture was purified by column chromatography (petroleum ether/ethyl acetate = 20:1) to afford **M2-5** (383.0 mg, 42%) as white powder. <sup>1</sup>H NMR (300 MHz, Benzene-*d*<sub>6</sub>)  $\delta$  8.57 (d, *J* = 23.0 Hz, 4H), 7.99 (s, 2H), 7.89 (t, *J* = 7.9 Hz, 4H), 7.80 (s, 4H), 7.76-7.66 (m, 2H), 7.31 (dd, *J* = 22.3, 7.9 Hz, 10H), 6.72 (s, 2H), 2.14 (tp, *J* = 12.9, 6.4, 5.3 Hz, 8H), 1.07 (tt, *J* = 18.6, 7.5 Hz, 49H), 0.79 (t, *J* = 6.7 Hz, 12H). <sup>13</sup>C NMR (75 MHz, Benzene-*d*<sub>6</sub>)  $\delta$  151.60, 150.99, 141.82, 141.35, 139.99, 139.58, 139.20, 134.47, 133.69, 126.99, 126.75, 126.19, 125.79, 124.36, 124.24, 122.81, 121.70, 120.25, 119.88, 119.46, 119.30, 110.92, 110.89, 55.31, 40.70, 31.81, 30.17, 29.27, 29.24, 24.03, 22.62, 13.96.

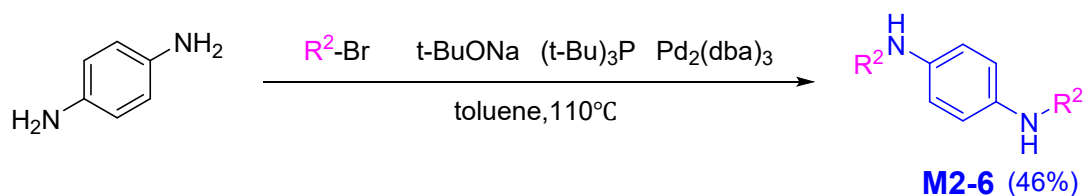

**Scheme S4.** The Synthesis procedures of **M2-6**.

#### Synthesis of **M2-6**:

p-Phenylenediamine (200.0 mg, 1.85 mmol), 2-bromo-9,9-dioctyl-9H-fluorene (2.0 g, 4.25 mmol), Pd<sub>2</sub>(dba)<sub>3</sub> (67.7 mg, 73.98  $\mu\text{mol}$ ), tri-tert-butylphosphine tetrafluoroborate (53.7 mg, 184.94  $\mu\text{mol}$ ), and NaOtBu (533.2 mg, 5.55 mmol) in dry toluene (30 mL) were heated to 110 °C in an oven dried Schlenk flask under N<sub>2</sub> atmosphere for 18 hours. After cooling to room temperature, the reaction mixture was quenched with water and extracted with ethyl acetate. The organic phase was dried with anhydrous Na<sub>2</sub>SO<sub>4</sub> and the solvent was evaporated. The reaction mixture was purified by column chromatography (petroleum) to afford **M2-6** (761.0 mg, 46%) as pink powder. <sup>1</sup>H NMR (400 MHz, Benzene-*d*<sub>6</sub>)  $\delta$  7.57 (d, *J* = 7.2 Hz, 2H), 7.52 (d, *J* =



8.1 Hz, 2H), 7.29 (d,  $J = 7.4$  Hz, 2H), 7.24 (dt,  $J = 13.1, 7.0$  Hz, 5H), 7.00 (d,  $J = 17.6$  Hz, 6H), 6.90 (dd,  $J = 8.1, 2.1$  Hz, 2H), 5.11 (s, 2H), 2.02 (q,  $J = 6.8, 6.4$  Hz, 8H), 1.13 (dd,  $J = 23.5, 9.1$  Hz, 50H), 0.84 (t,  $J = 7.1$  Hz, 12H).  $^{13}\text{C}$  NMR (75 MHz, Benzene- $d_6$ )  $\delta$  152.48, 150.03, 144.03, 141.74, 137.47, 133.99, 126.94, 125.82, 122.56, 120.67, 120.55, 118.82, 115.53, 111.27, 54.99, 40.85, 31.84, 30.29, 29.34, 24.04, 22.64, 13.99.

### 3. Synthesis procedures of the chiral conjugated oligomers

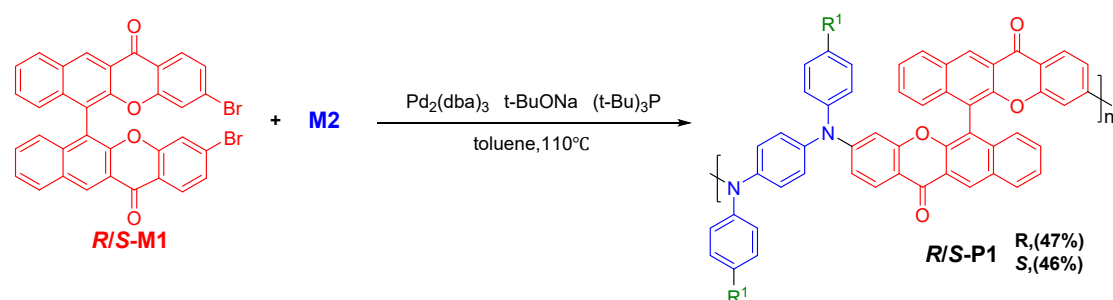

**Scheme S5.** The Synthesis procedures of **R/S-P1**.

#### Synthesis of **R/S-P1**:

**R/S-M1** (200.0 mg, 308.50  $\mu\text{mol}$ ), **M2-1** (149.6 mg, 308.50  $\mu\text{mol}$ ),  $\text{Pd}_2(\text{dba})_3$  (14.1 mg, 15.42  $\mu\text{mol}$ ), tri-tert-butylphosphine tetrafluoroborate (17.9 mg, 61.70  $\mu\text{mol}$ ), and  $\text{NaOtBu}$  (118.6 mg, 1.23 mmol) in dry toluene (10 mL) were heated to 110  $^\circ\text{C}$  in an oven dried Schlenk flask under  $\text{N}_2$  atmosphere for 3 days. For end-capping purposes, first diphenylamine (10.4 mg, 61.70  $\mu\text{mol}$ ) was added to the reaction flask. After 12 hours, bromobenzene (19.4 mg, 123.40  $\mu\text{mol}$ ) was added to the reaction flask for another 12 hours. After cooling to room temperature, the reaction mixture was quenched with water and extracted with dichloromethane. The organic phase was dried with anhydrous  $\text{Na}_2\text{SO}_4$  and the solvent was evaporated. The residue was dissolved in 2 mL dichloromethane and precipitated in 150 mL methanol. The sediment was successively extracted with acetone and dichloromethane for 24 h in a Soxhlet apparatus. The obtained dichloromethane solution was evaporated to about 5 mL, and subsequently precipitated in 150 mL methanol. Orange solid was obtained by filtration. **R-P1**, 146 mg, yield: 47%; **S-P1**, 145 mg, yield: 46%.  $^1\text{H}$  NMR (300 MHz, Chloroform- $d$ )  $\delta$  9.19 (s, 1H), 9.08 (d,  $J = 7.5$  Hz, 1H), 8.36 (d,  $J = 8.9$  Hz, 1H), 8.27-

7.89 (m, 3H), 7.43 (dt,  $J = 41.8, 7.3$  Hz, 4H), 6.95 (ddt,  $J = 85.6, 37.1, 9.8$  Hz, 15H), 6.24 (s, 1H), 2.52 (t,  $J = 7.9$  Hz, 4H), 1.73-1.40 (m, 4H), 1.28 (dd,  $J = 11.6, 6.3$  Hz, 19H), 0.87 (q,  $J = 4.4, 3.1$  Hz, 6H).

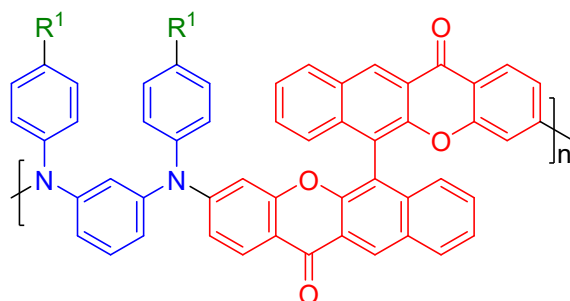

***R/S-P2*** *R*,(58%)  
*S*,(64%)

***R/S-P2***: *R/S-M1* (200.0 mg, 308.50  $\mu$ mol), ***M2-2*** (149.6 mg, 308.50  $\mu$ mol), Pd<sub>2</sub>(dba)<sub>3</sub> (14.1 mg, 15.42  $\mu$ mol), tri-tert-butylphosphine tetrafluoroborate (17.9 mg, 61.70  $\mu$ mol), NaOtBu (118.6 mg, 1.23 mmol), diphenylamine (10.4 mg, 61.70  $\mu$ mol), bromobenzene (19.4 mg, 123.40  $\mu$ mol). Prepared according to same procedure of ***R/S-P1***, yellow powder, ***R-P2***, 180 mg, yield: 58%; ***S-P2***, 198 mg, yield: 64%. <sup>1</sup>H NMR (300 MHz, Chloroform-*d*)  $\delta$  8.98 (d,  $J = 13.7$  Hz, 1H), 7.96 (dt,  $J = 27.3, 9.7$  Hz, 3H), 7.51-6.97 (m, 5H), 6.83 (dp,  $J = 16.5, 8.5, 7.7$  Hz, 4H), 6.71-6.31 (m, 7H), 6.18 (d,  $J = 15.9$  Hz, 2H), 2.37 (t,  $J = 8.3$  Hz, 4H), 1.28-0.92 (m, 17H), 0.78 (t,  $J = 6.3$  Hz, 6H).

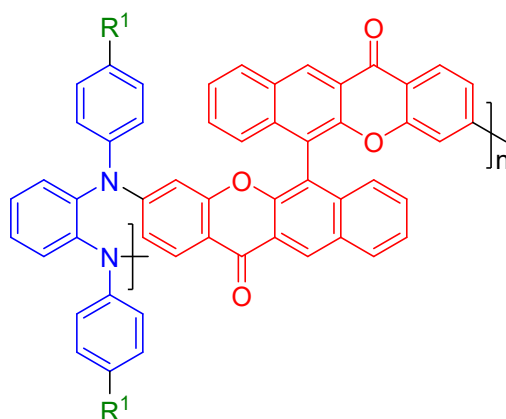

***R/S-P3*** *R*,(64%)  
*S*,(55%)

**R/S-P3:** **R/S-M1** (200.0 mg, 308.50  $\mu\text{mol}$ ), **M2-3** (149.6 mg, 308.50  $\mu\text{mol}$ ),  $\text{Pd}_2(\text{dba})_3$  (14.1 mg, 15.42  $\mu\text{mol}$ ), tri-tert-butylphosphine tetrafluoroborate (17.9 mg, 61.70  $\mu\text{mol}$ ),  $\text{NaOtBu}$  (118.5 mg, 1.23 mmol), diphenylamine (10.4 mg, 61.70  $\mu\text{mol}$ ), bromobenzene (19.4 mg, 123.40  $\mu\text{mol}$ ). Prepared according to same procedure of **R/S-P1**, yellow powder, **R-P3**, 139 mg, yield: 64%; **S-P3**, 119 mg, yield: 55%.  $^1\text{H}$  NMR (300 MHz, Benzene- $d_6$ )  $\delta$  7.25 (s, 1H), 7.00 (d,  $J = 7.9$  Hz, 3H), 6.87 (s, 1H), 6.77 (d,  $J = 7.9$  Hz, 3H), 2.50 (t,  $J = 7.6$  Hz, 4H), 1.55 (s, 5H), 1.26 (s, 21H), 0.90 (t,  $J = 6.4$  Hz, 6H).

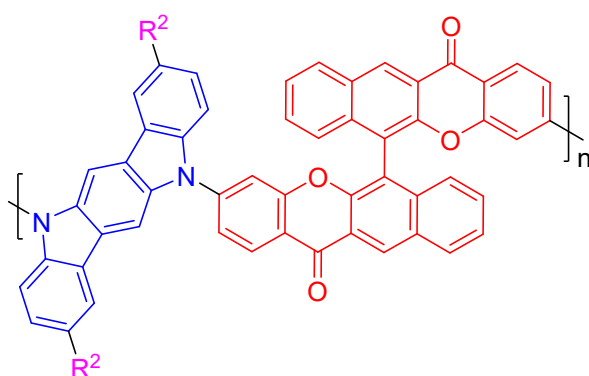

**R/S-P4** **R,(75%)**  
**S,(81%)**

**R/S-P4:** **R/S-M1** (80.0 mg, 123.40  $\mu\text{mol}$ ), **M2-4** (127.5 mg, 123.40  $\mu\text{mol}$ ),  $\text{Pd}_2(\text{dba})_3$  (5.7 mg, 6.17  $\mu\text{mol}$ ), tri-tert-butylphosphine tetrafluoroborate (7.2 mg, 24.68  $\mu\text{mol}$ ),  $\text{NaOtBu}$  (47.4 mg, 493.60  $\mu\text{mol}$ ), diphenylamine (4.2 mg, 24.68  $\mu\text{mol}$ ), bromobenzene (7.8 mg, 49.36  $\mu\text{mol}$ ). Prepared according to same procedure of **R/S-P1**, yellow powder, **R-P4**, 145 mg, yield: 75%; **S-P4**, 155 mg, yield: 81%.  $^1\text{H}$  NMR (300 MHz, Chloroform- $d$ )  $\delta$  9.14 (d,  $J = 4.7$  Hz, 1H), 8.60 (t,  $J = 7.5$  Hz, 1H), 8.25-7.86 (m, 3H), 7.76-6.94 (m, 17H), 1.29-0.75 (m, 24H), 0.64 (q,  $J = 7.2$  Hz, 12H).



Hz, 2H), 7.91-7.14 (m, 11H), 7.12-6.64 (m, 6H), 6.60-6.19 (m, 1H), 2.40-1.50 (m, 7H), 1.36-0.83 (m, 24H), 0.82-0.30 (m, 12H).

#### 4. TGA curves of the chiral conjugated oligomers

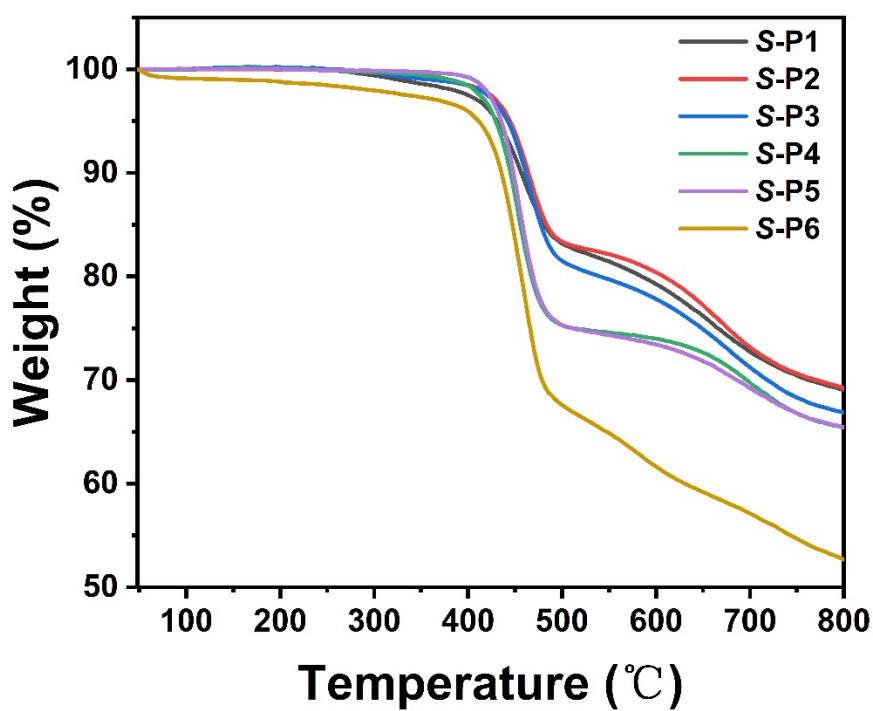

Figure S1. The TGA curves of chiral conjugated oligomers.

## 5. Photophysical Properties of the chiral conjugated oligomers

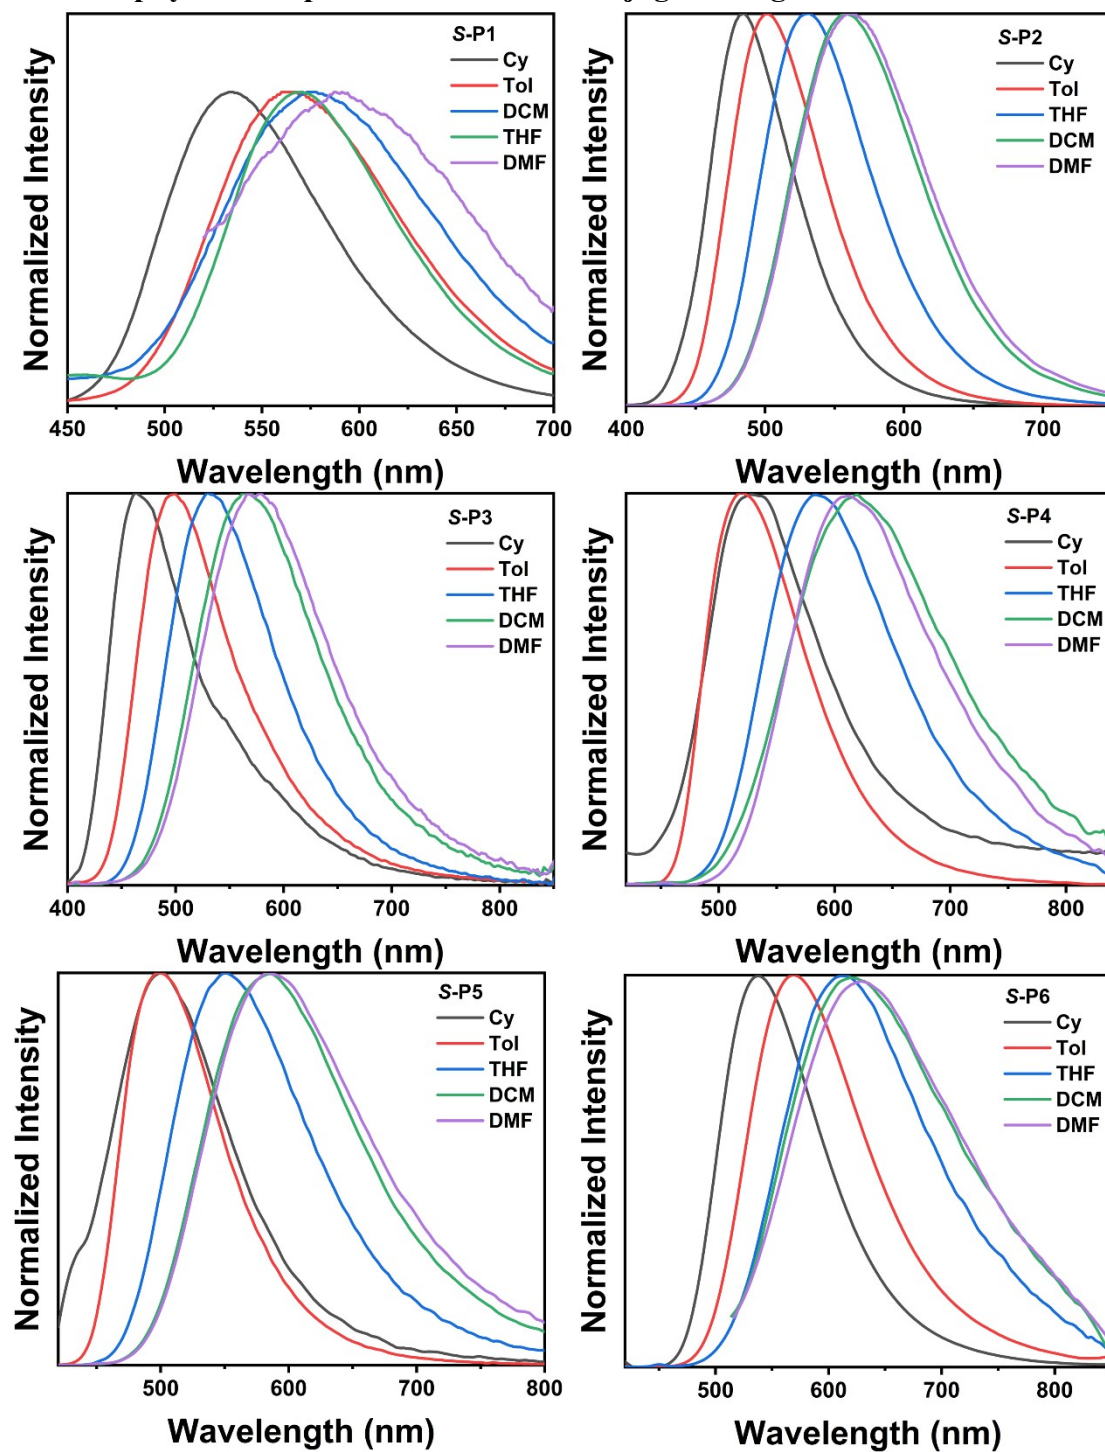

**Figure S2.** Solvatochromic PL spectra of chiral conjugated oligomers in toluene solutions ( $1 \times 10^{-5}$  M).

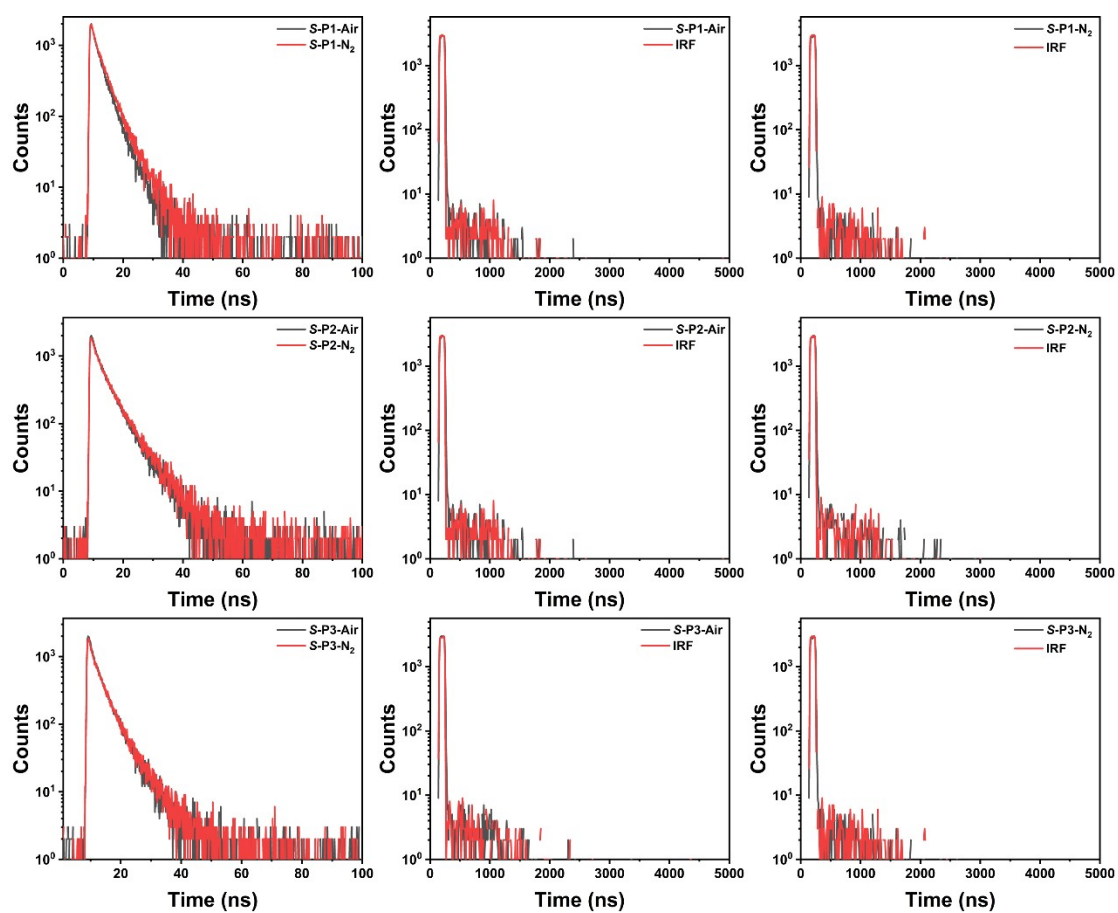

**Figure S3.** Transient PL spectra of *S*-P1, *S*-P2 and *S*-P3 in toluene under air and N<sub>2</sub> atmosphere ( $1 \times 10^{-5}$  mol L<sup>-1</sup>).

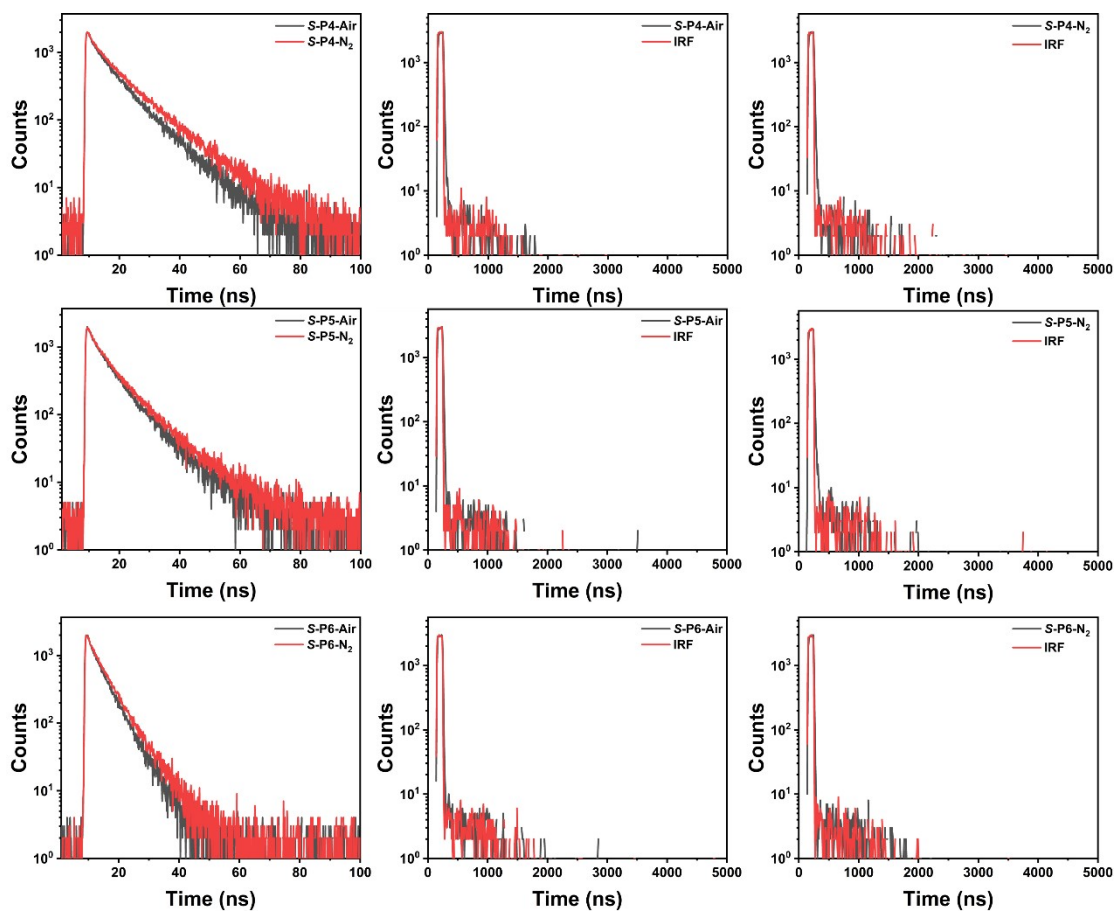

**Figure S4.** Transient PL spectra of *S*-P4, *S*-P5 and *S*-P6 in toluene under air and N<sub>2</sub> atmosphere ( $1 \times 10^{-5}$  mol L<sup>-1</sup>).



**Table S1.** The fitting data of the Transient PL curves.<sup>a</sup>

| sample                 | $\tau_1$ (ns) | $\tau_2$ (ns) | $A_1$     | $A_2$     | $\tau$ (ns) | $\chi^2$ |
|------------------------|---------------|---------------|-----------|-----------|-------------|----------|
| S-P1 in air            | 1.6675        | 3.8628        | 882.1083  | 1043.6953 | 3.2760      | 1.0413   |
| S-P2 in air            | 1.9245        | 5.6427        | 1072.5784 | 941.5850  | 4.6023      | 0.9636   |
| S-P3 in air            | 1.8291        | 4.8901        | 1333.0754 | 849.8547  | 3.7582      | 0.9503   |
| S-P4 in air            | 3.1576        | 9.6504        | 867.1578  | 1109.5565 | 8.3282      | 0.9450   |
| S-P5 in air            | 3.5782        | 9.1947        | 1151.7531 | 862.4957  | 7.2741      | 1.1128   |
| S-P6 in air            | 1.6231        | 5.0924        | 567.2856  | 1550.0325 | 4.7300      | 0.9295   |
| S-P1 in N <sub>2</sub> | 1.7632        | 4.4038        | 978.0928  | 1103.4337 | 3.7121      | 1.0082   |
| S-P2 in N <sub>2</sub> | 2.0451        | 6.0265        | 989.0323  | 904.1331  | 4.9487      | 1.0426   |
| S-P3 in N <sub>2</sub> | 2.0415        | 5.3386        | 1044.9878 | 681.5928  | 4.1200      | 1.0515   |
| S-P4 in N <sub>2</sub> | 3.3447        | 11.3330       | 812.3218  | 1157.2357 | 9.9621      | 1.0766   |
| S-P5 in N <sub>2</sub> | 3.8697        | 10.4361       | 1040.3115 | 821.0293  | 8.3371      | 1.1162   |
| S-P6 in N <sub>2</sub> | 2.2577        | 5.8488        | 550.9114  | 1512.4878 | 5.4061      | 1.0326   |

<sup>a</sup>The Transient PL curves were fitted by the function:  $I(\tau) = A_1 \exp(-\tau/\tau_1) + A_2 \exp(-\tau/\tau_2)$ . The average fluorescence lifetimes can be calculated by the equation:  $\tau = (A_1 \tau_1^2 + A_2 \tau_2^2)/(A_1 \tau_1 + A_2 \tau_2)$ .

**Table S2.** Photoluminescence quantum yields ( $\Phi_{\text{PL}}$ ) and lifetimes ( $\tau$ ) of the chiral conjugated oligomers in toluene under air and N<sub>2</sub> atmosphere.

| oligomer | $\tau$ (ns) |                | $\Phi_{\text{PL}}$ (%) |                |
|----------|-------------|----------------|------------------------|----------------|
|          | air         | N <sub>2</sub> | air                    | N <sub>2</sub> |
| S-P1     | 3.28        | 3.71           | 16                     | 21             |
| S-P2     | 4.60        | 4.94           | 38                     | 40             |
| S-P3     | 3.76        | 4.12           | 25                     | 29             |
| S-P4     | 8.32        | 9.96           | 49                     | 51             |
| S-P5     | 7.27        | 8.34           | 36                     | 48             |
| S-P6     | 4.73        | 5.41           | 48                     | 54             |

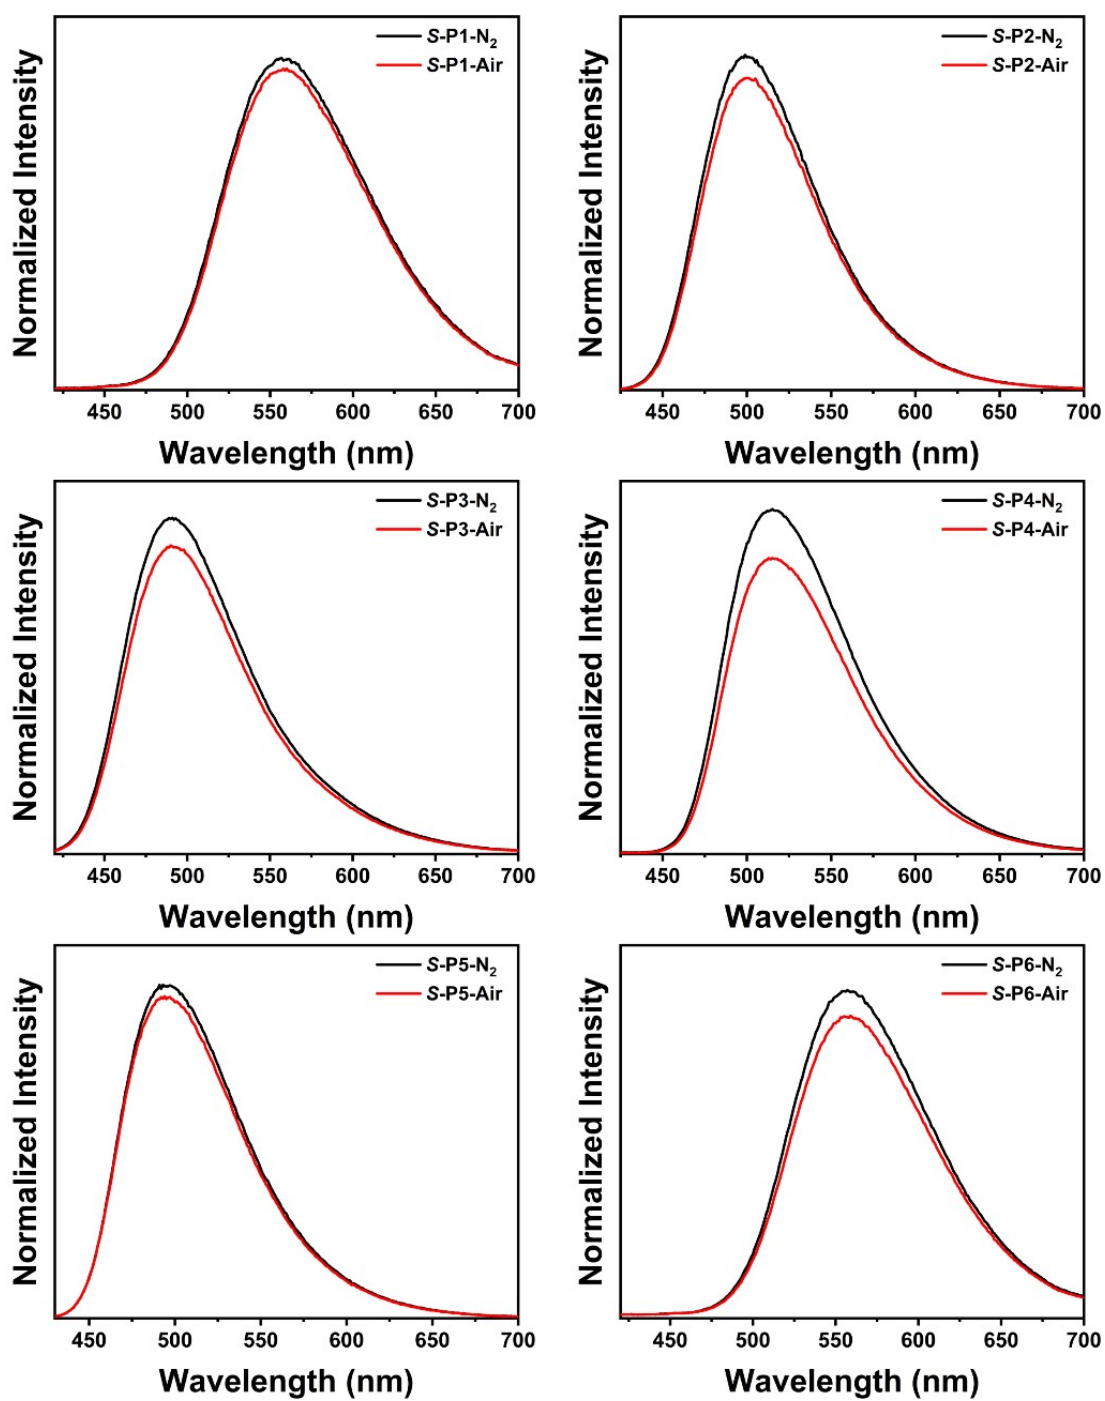

**Figure S5.** Fluorescence spectra of the chiral conjugated oligomers in toluene under air and N<sub>2</sub> atmosphere ( $1 \times 10^{-5}$  mol L<sup>-1</sup>).

## 6. Chiroptical properties of the chiral conjugated oligomers

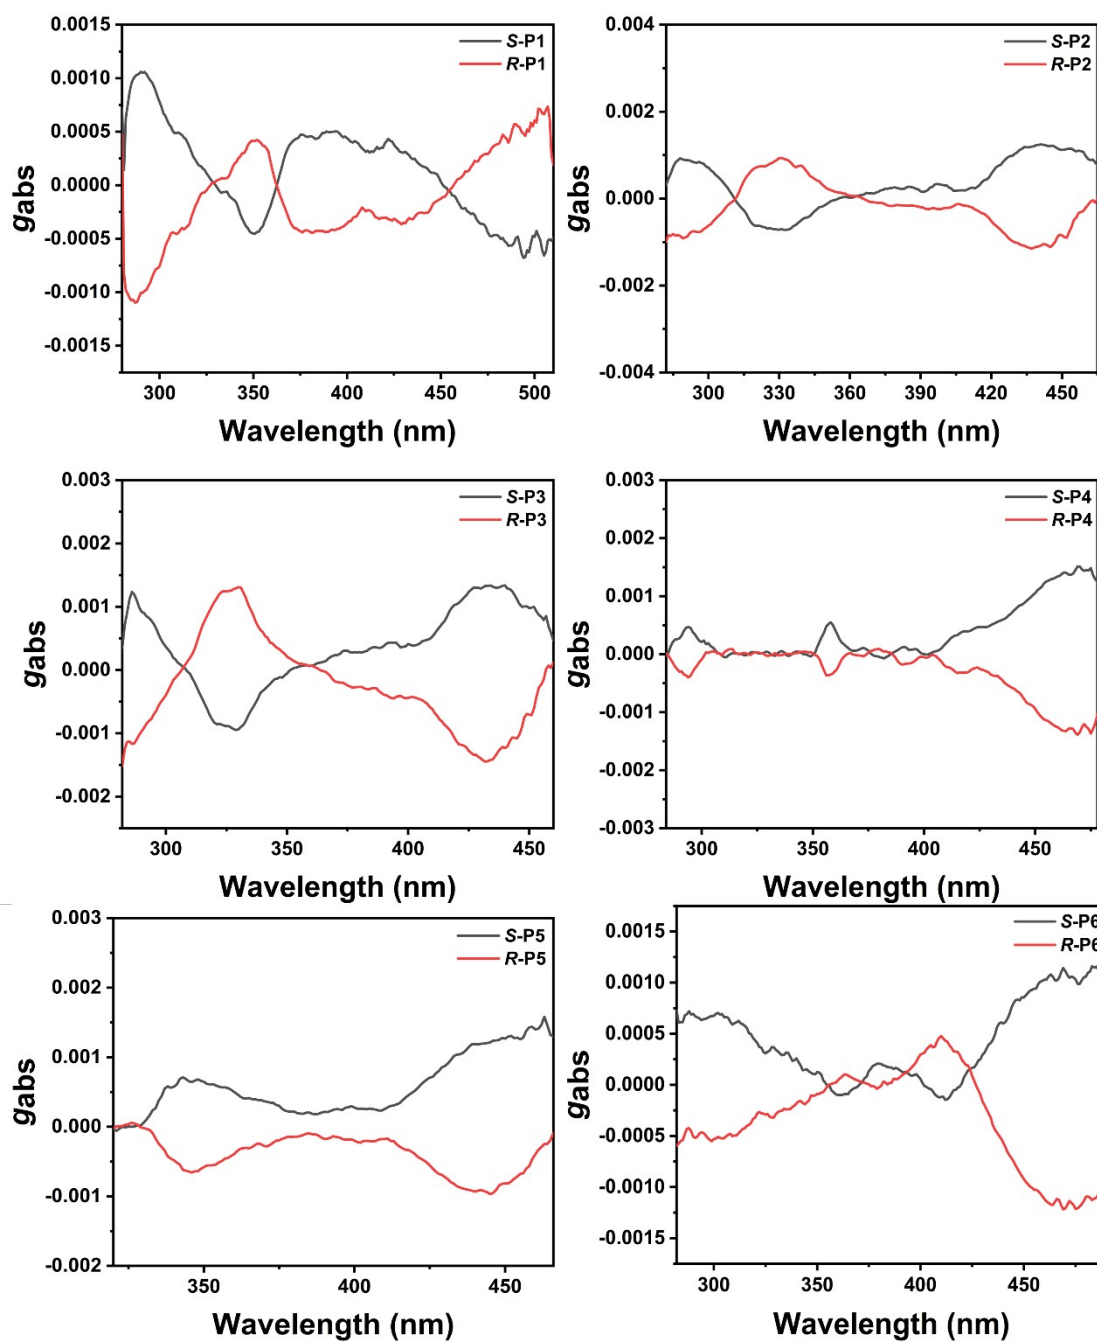

**Figure S6.** Curves of  $g_{\text{abs}}$  values versus wavelength for the chiral conjugated oligomers in toluene solutions ( $1 \times 10^{-4}$  M).

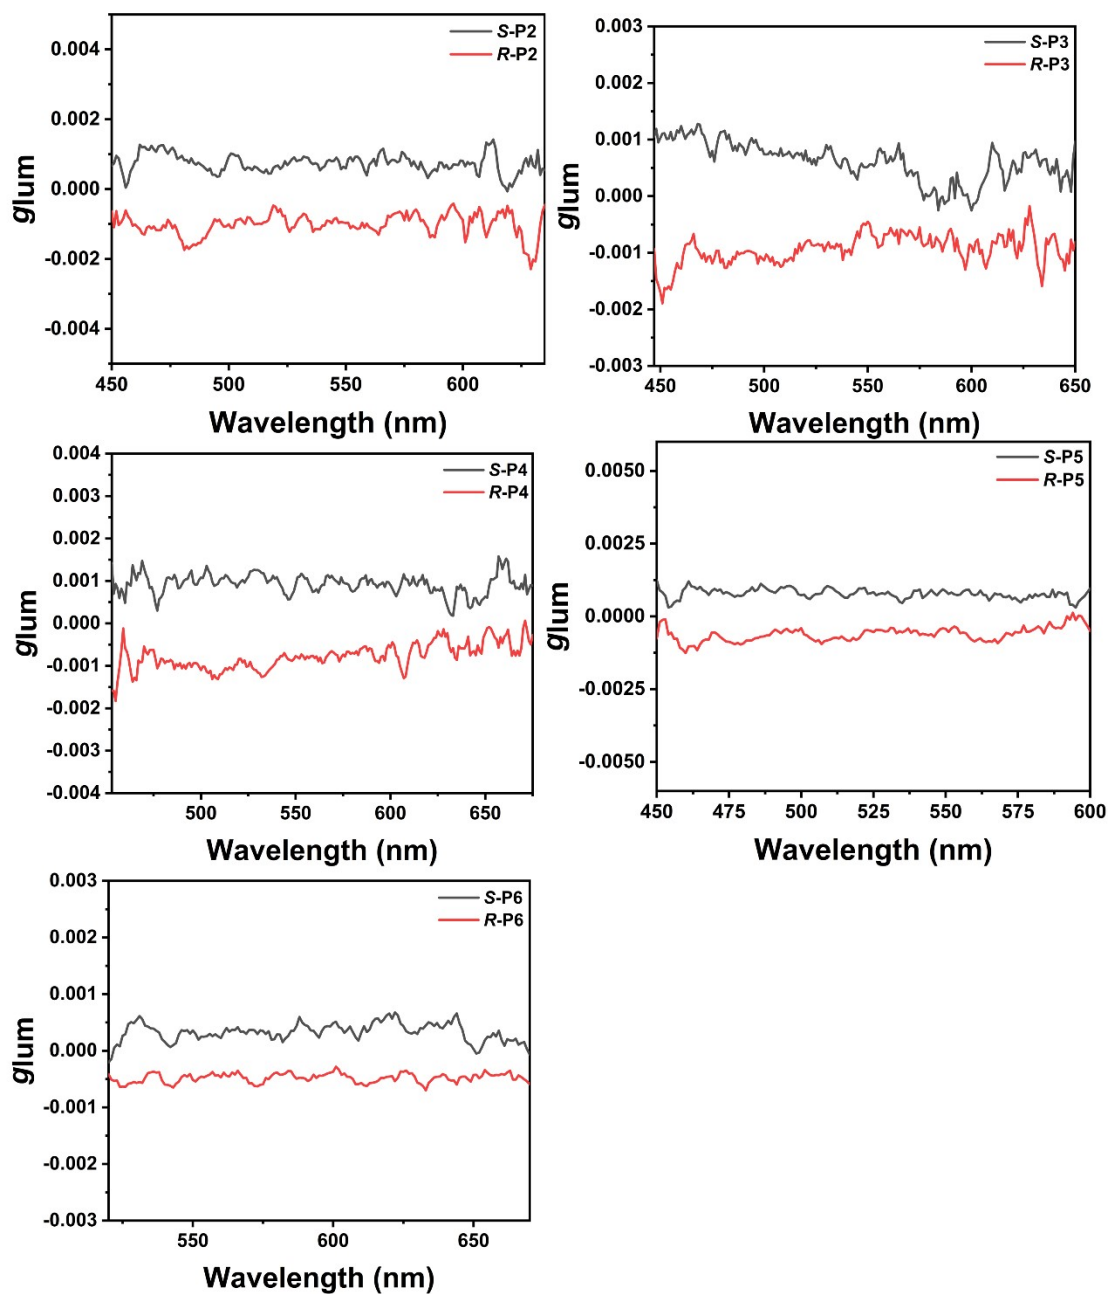

**Figure S7.** Curves of  $g_{lum}$  values versus wavelength for the chiral conjugated oligomers in toluene solutions ( $1 \times 10^{-4}$  M).

**Table S3.** Quantities for the calculation of  $B_{\text{CPL}}$ .<sup>a</sup>

| oligomer | $\varepsilon$ ( $\text{M}^{-1} \text{cm}^{-1}$ ) | $\Phi_{\text{PL}}$ | $g_{\text{lum}}$ ( $10^{-3}$ ) | $B_{\text{CPL}}$ ( $\text{M}^{-1} \text{cm}^{-1}$ ) |
|----------|--------------------------------------------------|--------------------|--------------------------------|-----------------------------------------------------|
| S-P1     | 55360                                            | 0.16               | -                              | -                                                   |
| S-P2     | 44640                                            | 0.38               | 0.93                           | 7.9                                                 |
| S-P3     | 49060                                            | 0.25               | 0.74                           | 4.5                                                 |
| S-P4     | 38110                                            | 0.49               | 1.19                           | 11.1                                                |
| S-P5     | 62260                                            | 0.36               | 0.76                           | 8.5                                                 |
| S-P6     | 46340                                            | 0.48               | 0.37                           | 4.1                                                 |

<sup>a</sup>Brightness of CPL ( $B_{\text{CPL}}$ ) can be calculated by the formula:  $B_{\text{CPL}} = \varepsilon \times \Phi_{\text{PL}} \times g_{\text{lum}}/2$ .

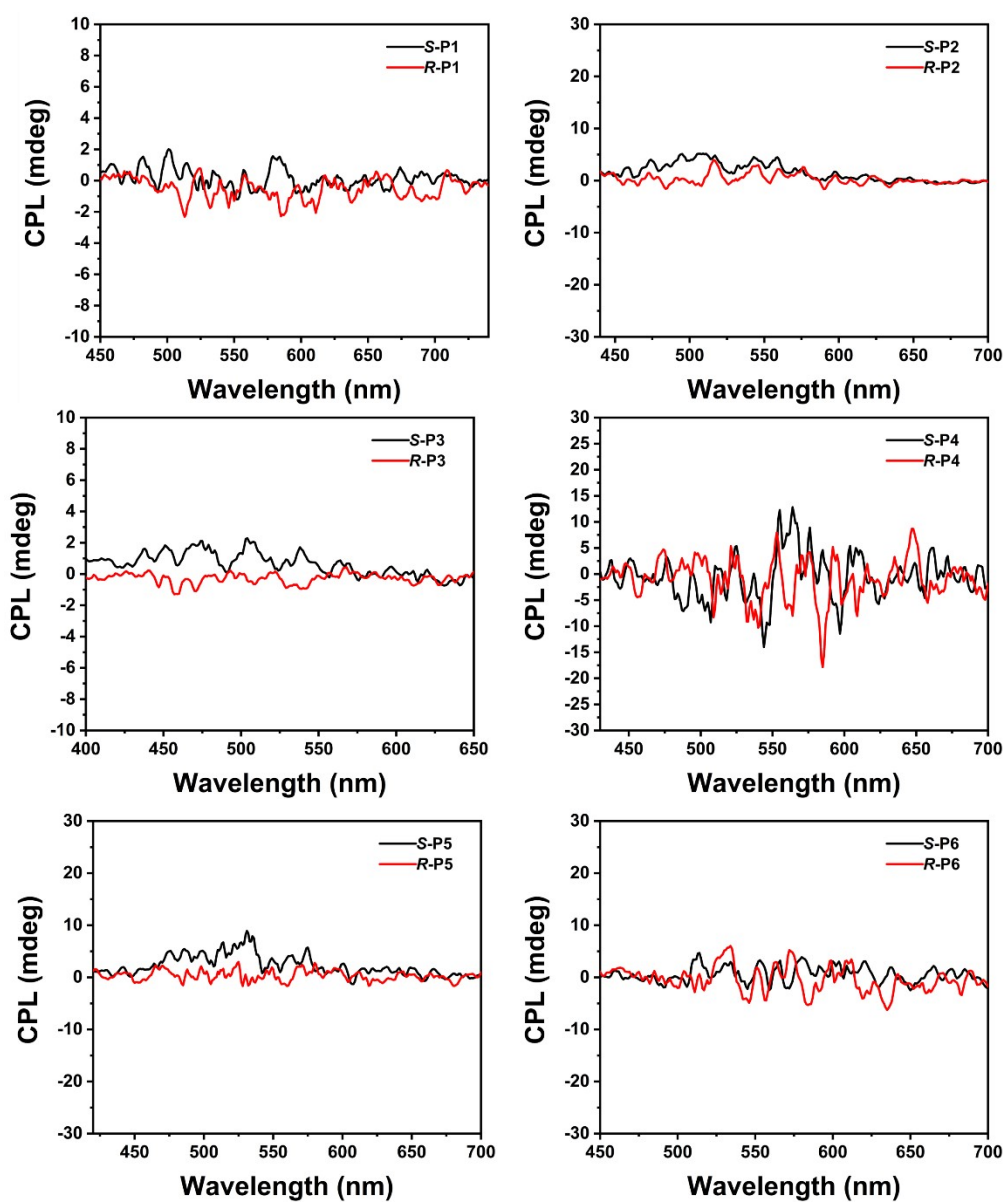

**Figure S8.** CPL spectra of doped films (1 wt% in PMMA) of the chiral conjugated oligomers.

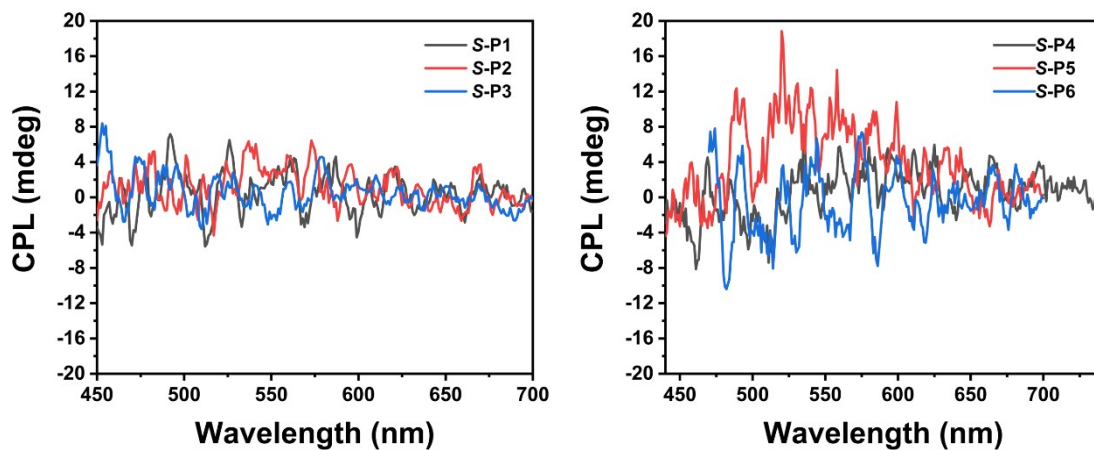

**Figure S9.** CPL spectra of neat films of the chiral conjugated oligomers.

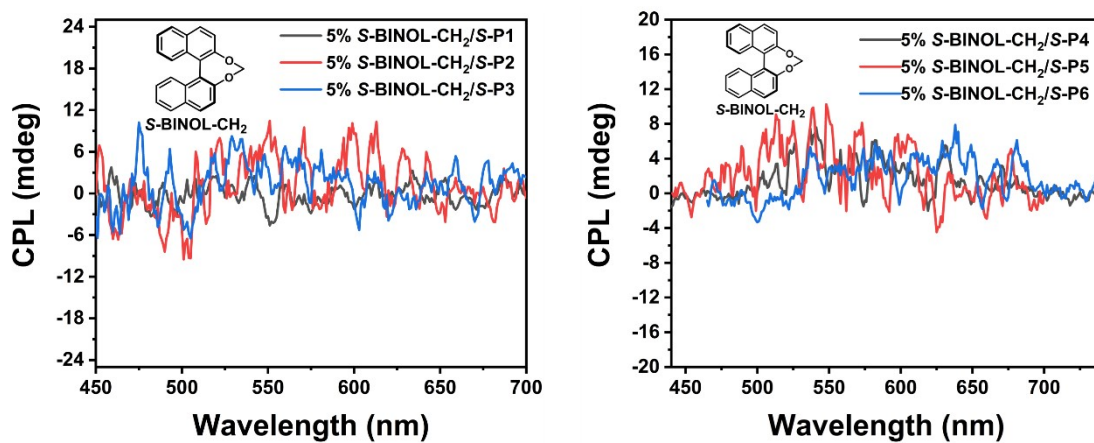

**Figure S10.** CPL spectra of films of the chiral conjugated oligomers doped with 5wt% S-BINOL-CH<sub>2</sub>.

## 7. NMR and HRMS Spectra of all new compounds

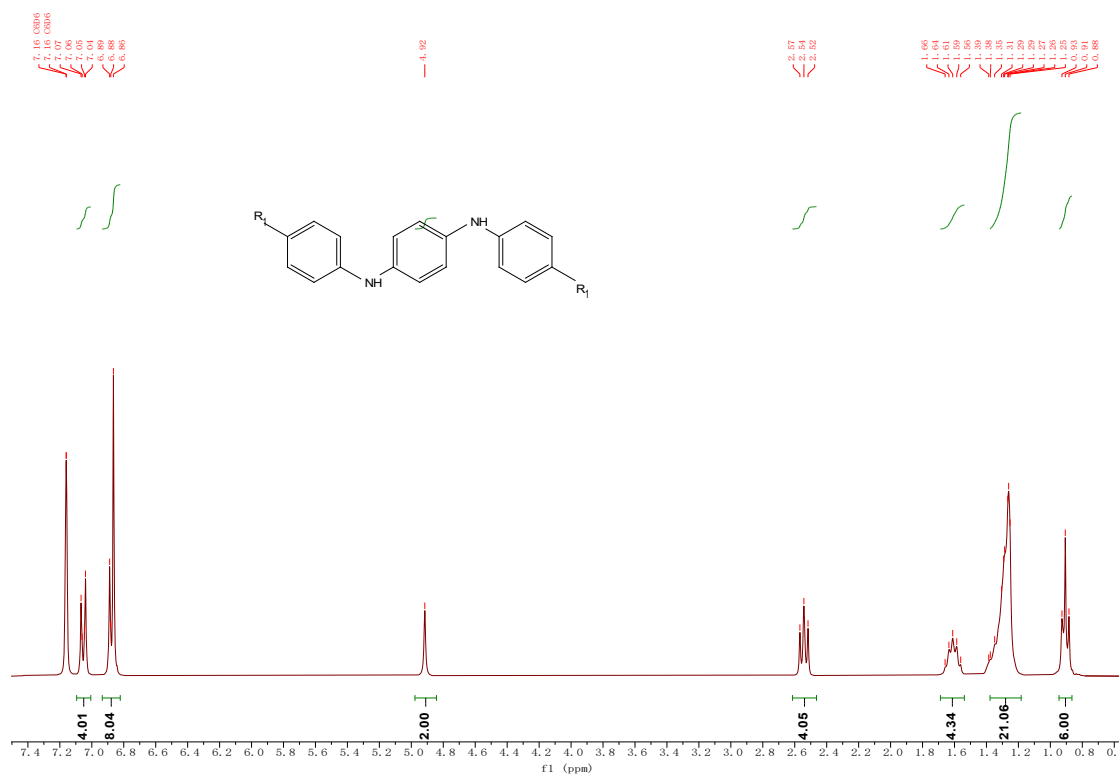

**Figure S11.**  $^1\text{H}$  NMR spectrum of M2-1 (300 MHz, Benzene- $d_6$ ).

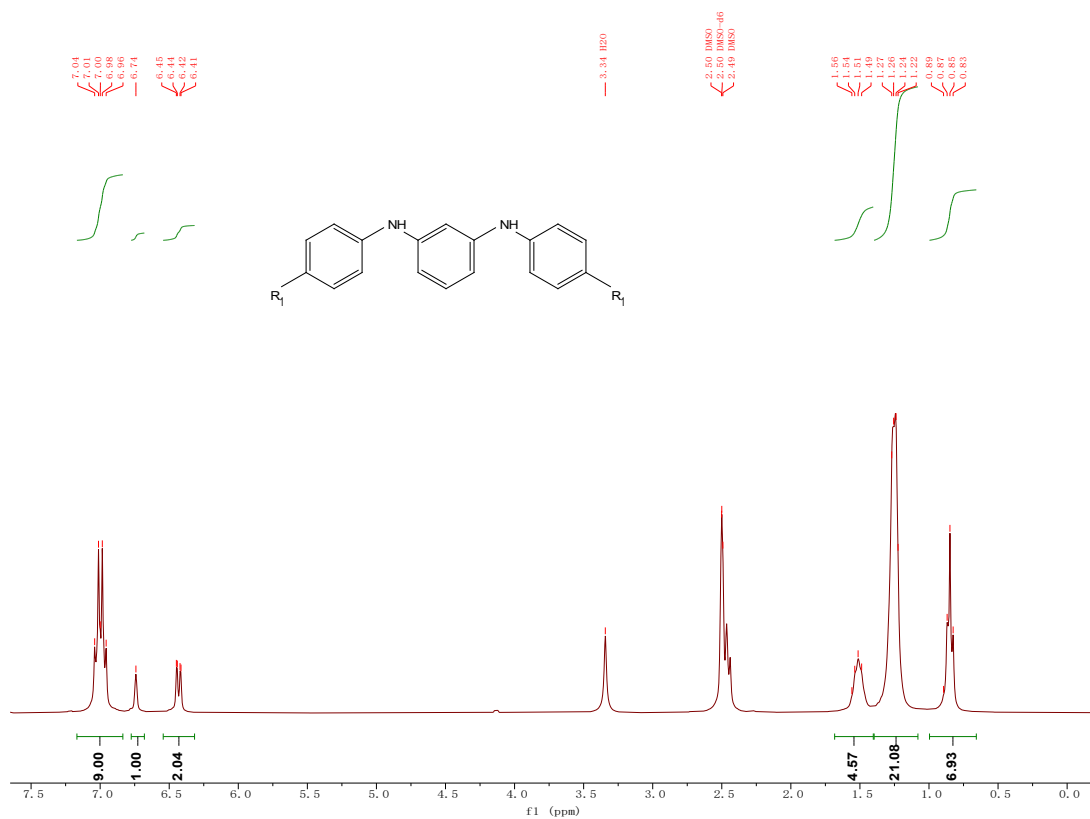

**Figure S12.**  $^1\text{H}$  NMR spectrum of M2-2 (300 MHz, DMSO- $d_6$ ).

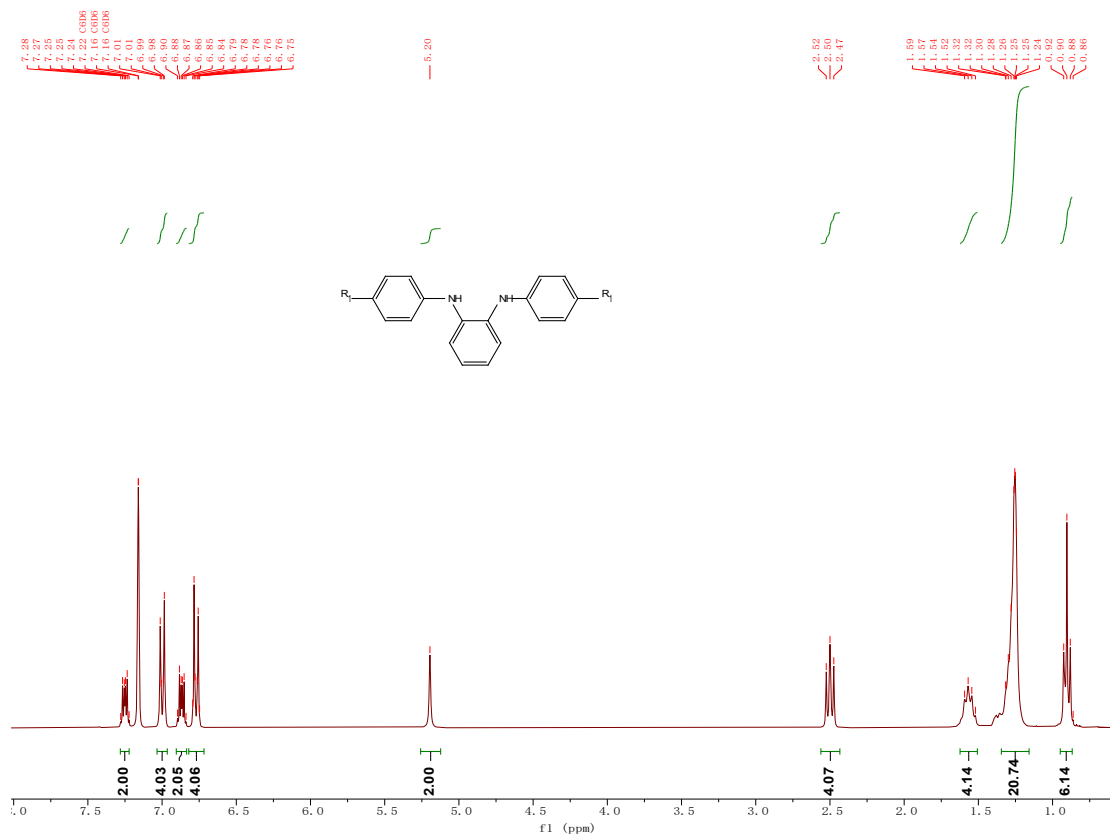

Figure S13. <sup>1</sup>H NMR spectrum of M2-3 (300 MHz, Benzene-*d*<sub>6</sub>).

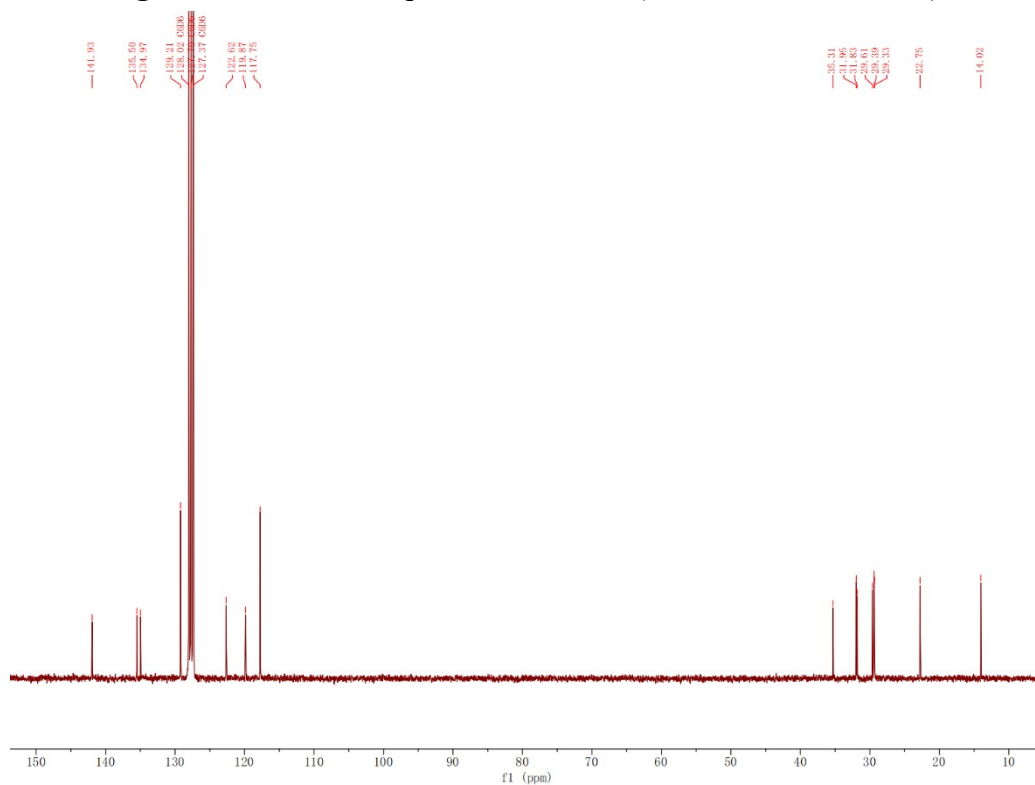

Figure S14. <sup>13</sup>C NMR spectrum of M2-3 (75 MHz, Benzene-*d*<sub>6</sub>).



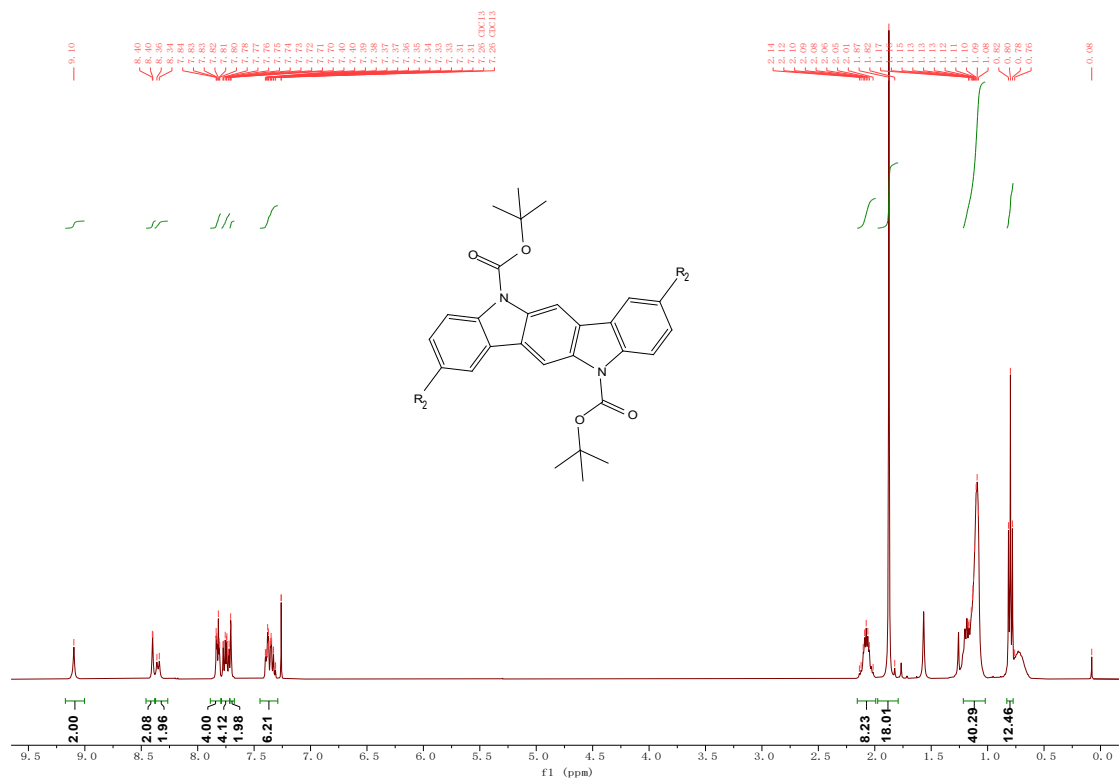

**Figure S15. <sup>1</sup>H NMR spectrum of **b** (400 MHz, Chloroform-*d*).**

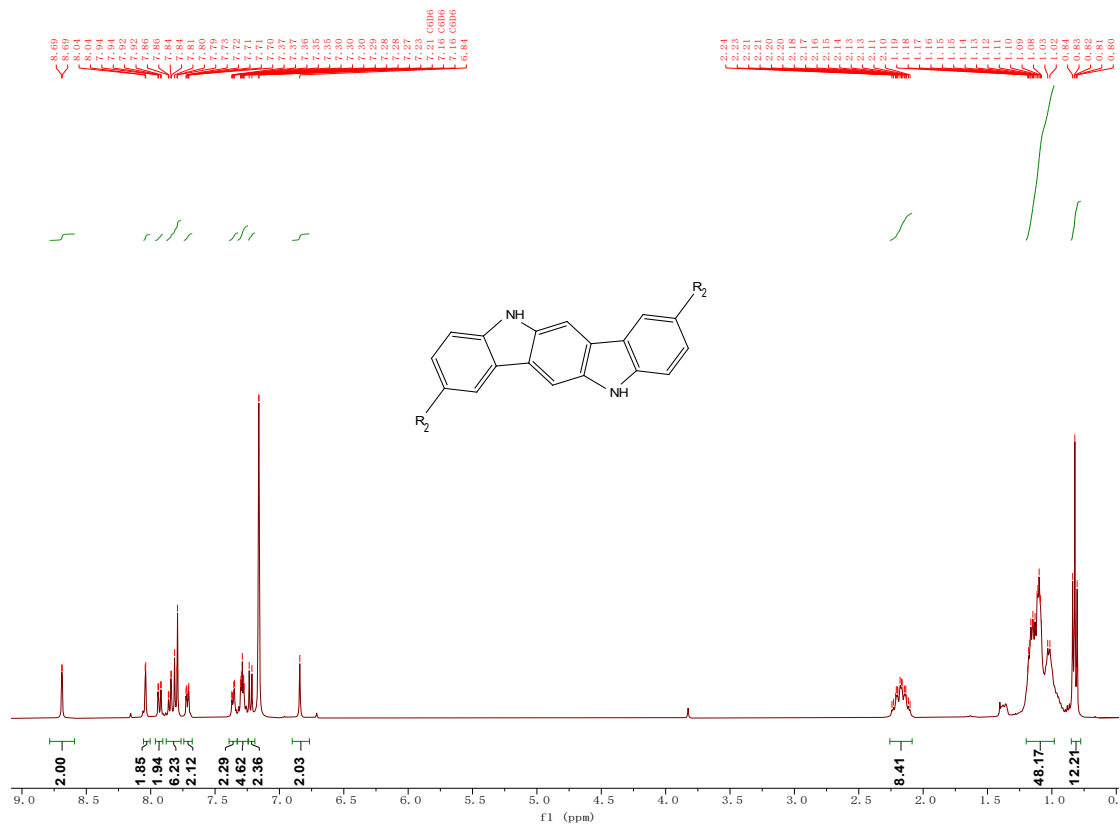

**Figure S16. <sup>1</sup>H NMR spectrum of **M2-4** (400 MHz, Benzene-*d*<sub>6</sub>).**

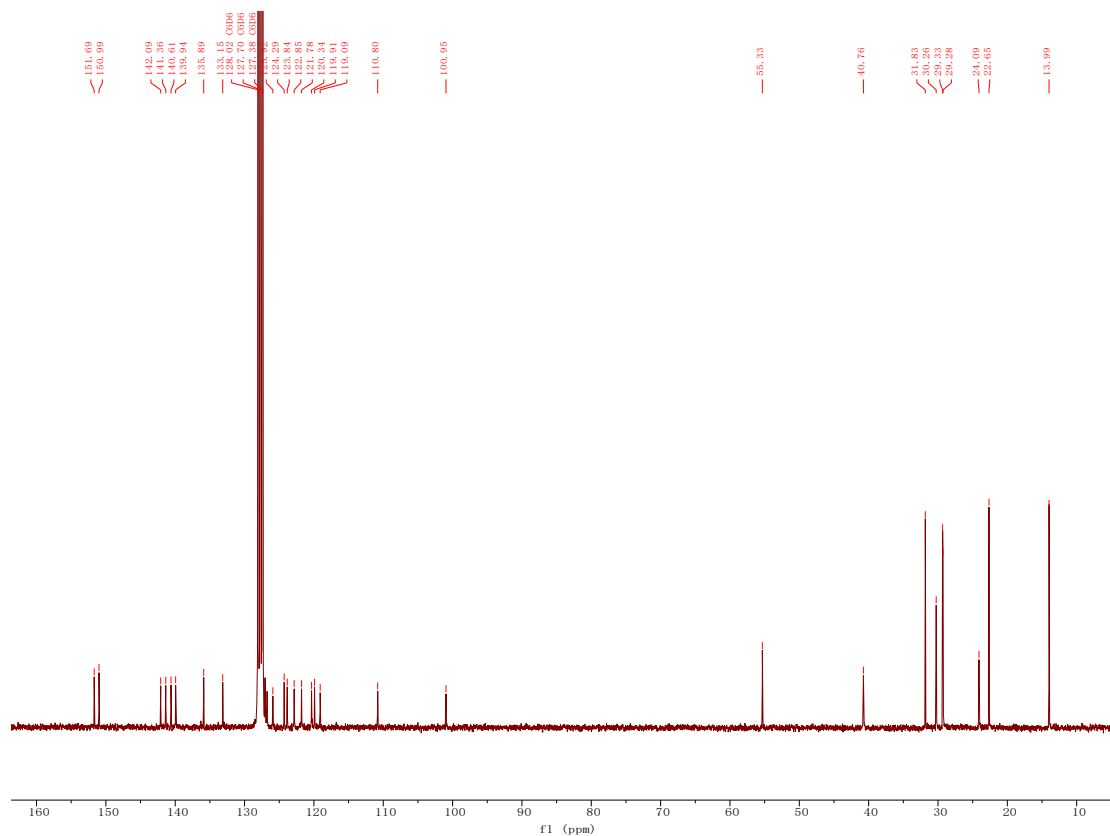

Figure S17.  $^{13}\text{C}$  NMR spectrum of M2-4 (75 MHz, Benzene- $d_6$ ).

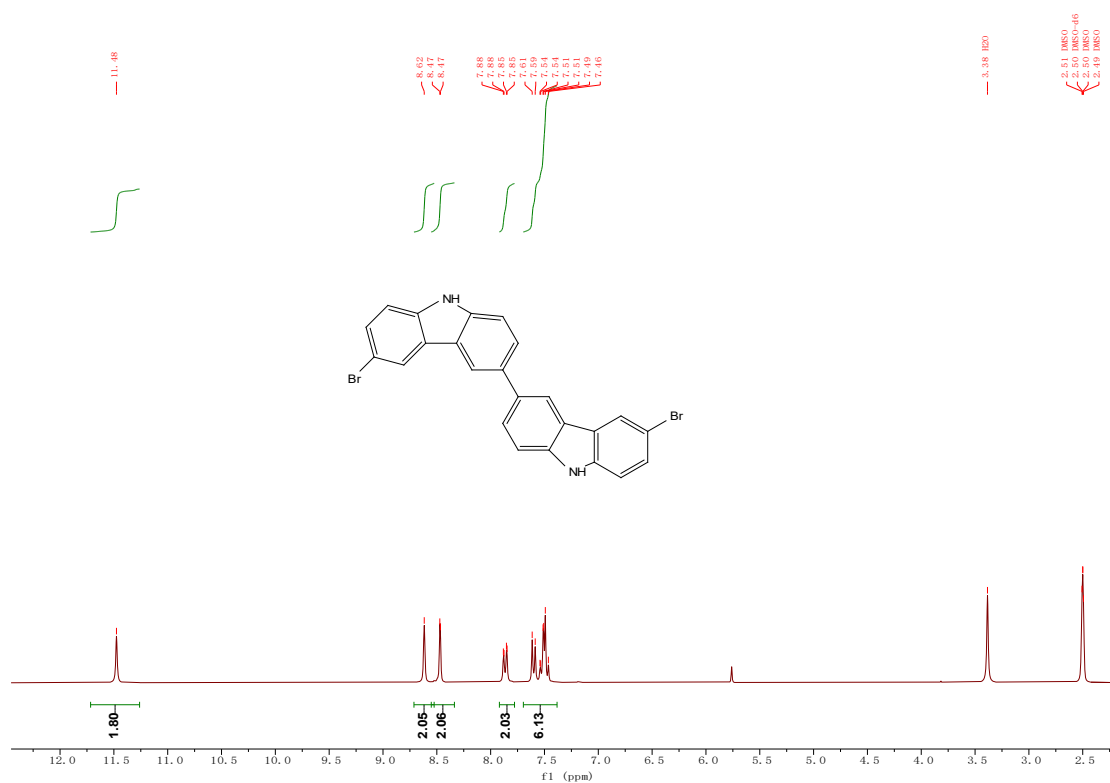

Figure S18.  $^1\text{H}$  NMR spectrum of c (300 MHz, DMSO- $d_6$ ).

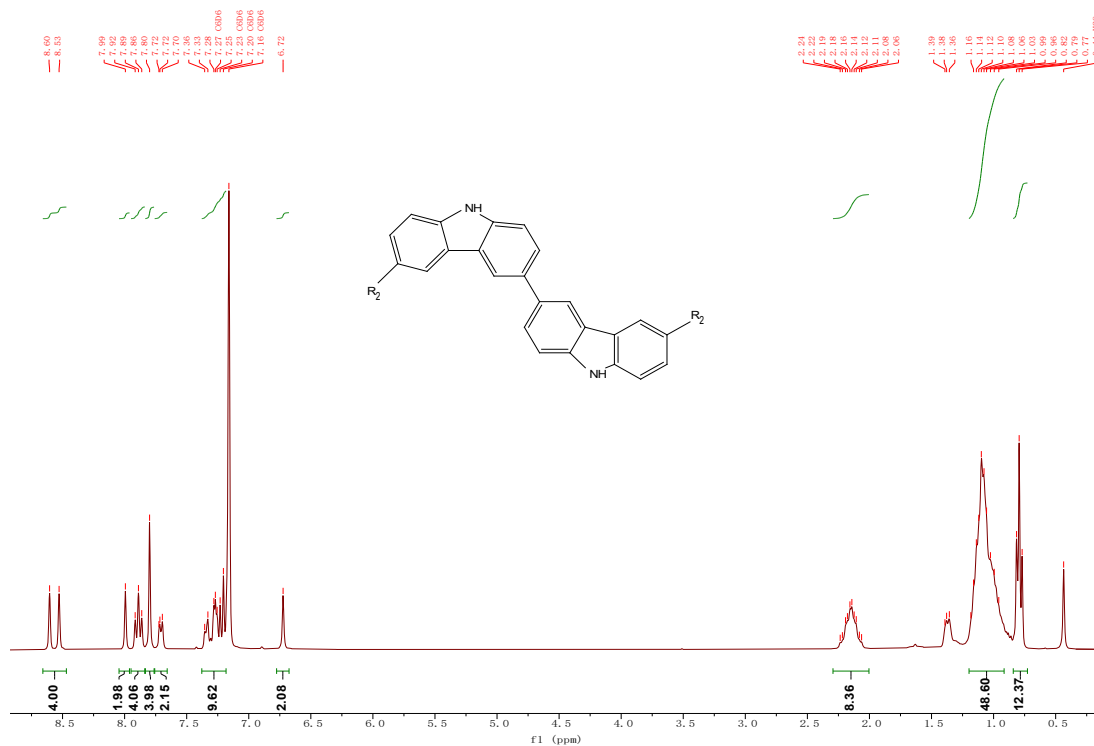

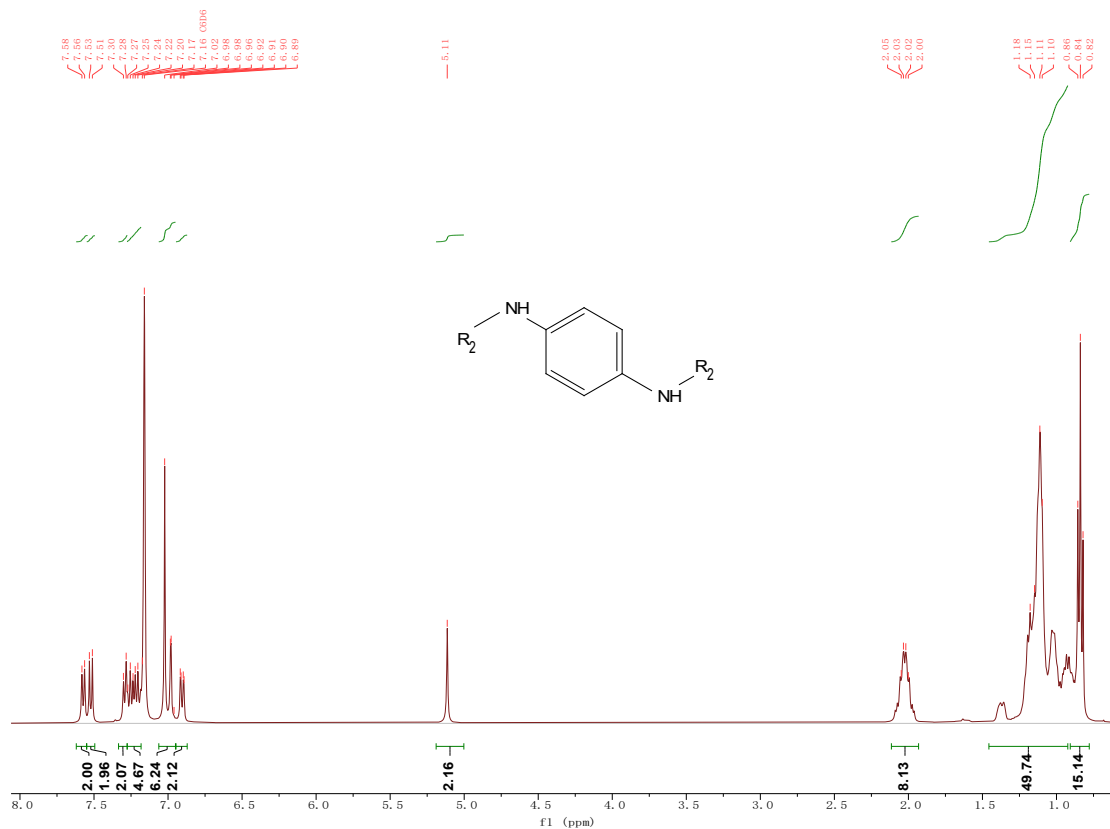

Figure S21. <sup>1</sup>H NMR spectrum of M2-6 (300 MHz, Benzene-*d*<sub>6</sub>).

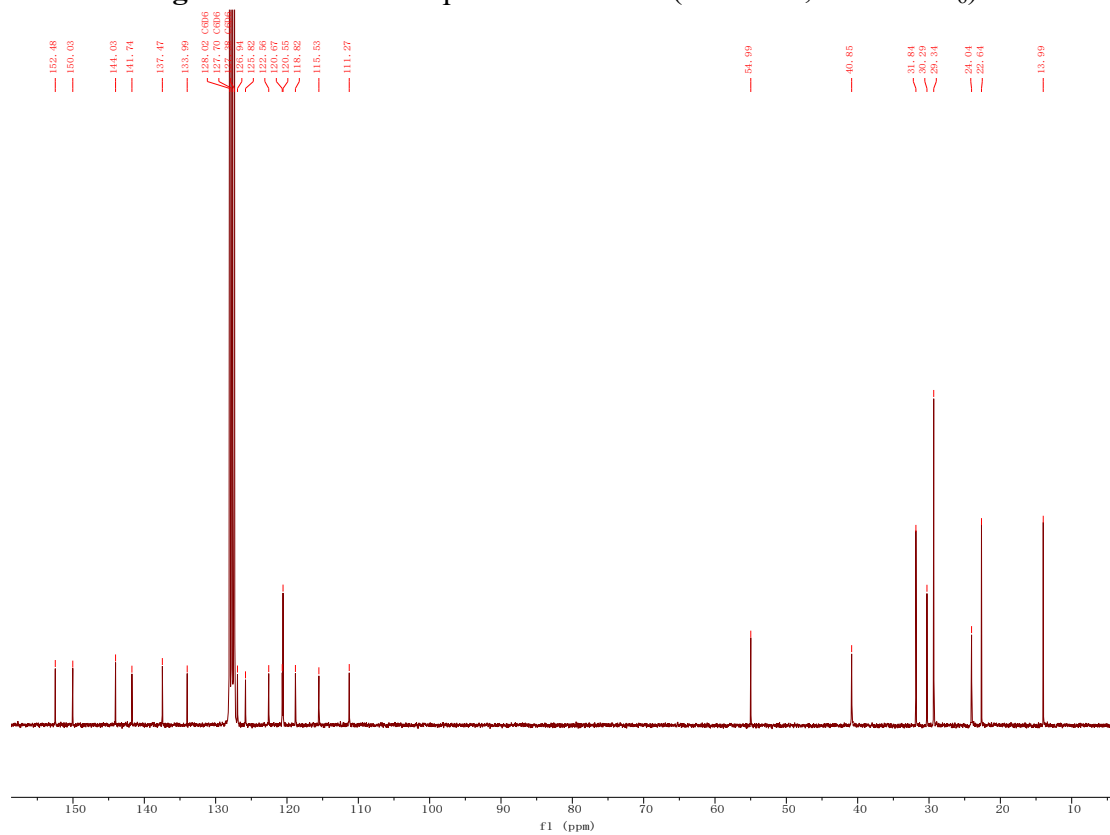

Figure S22. <sup>13</sup>C NMR spectrum of M2-6 (75 MHz, Benzene-*d*<sub>6</sub>).

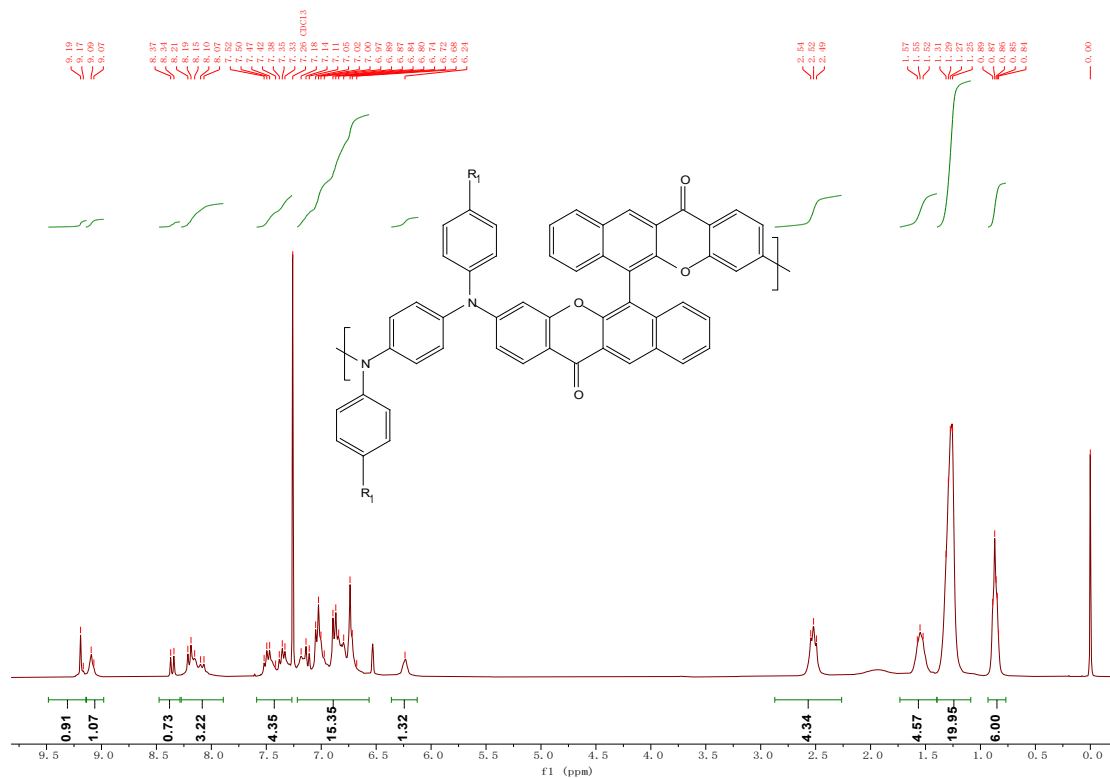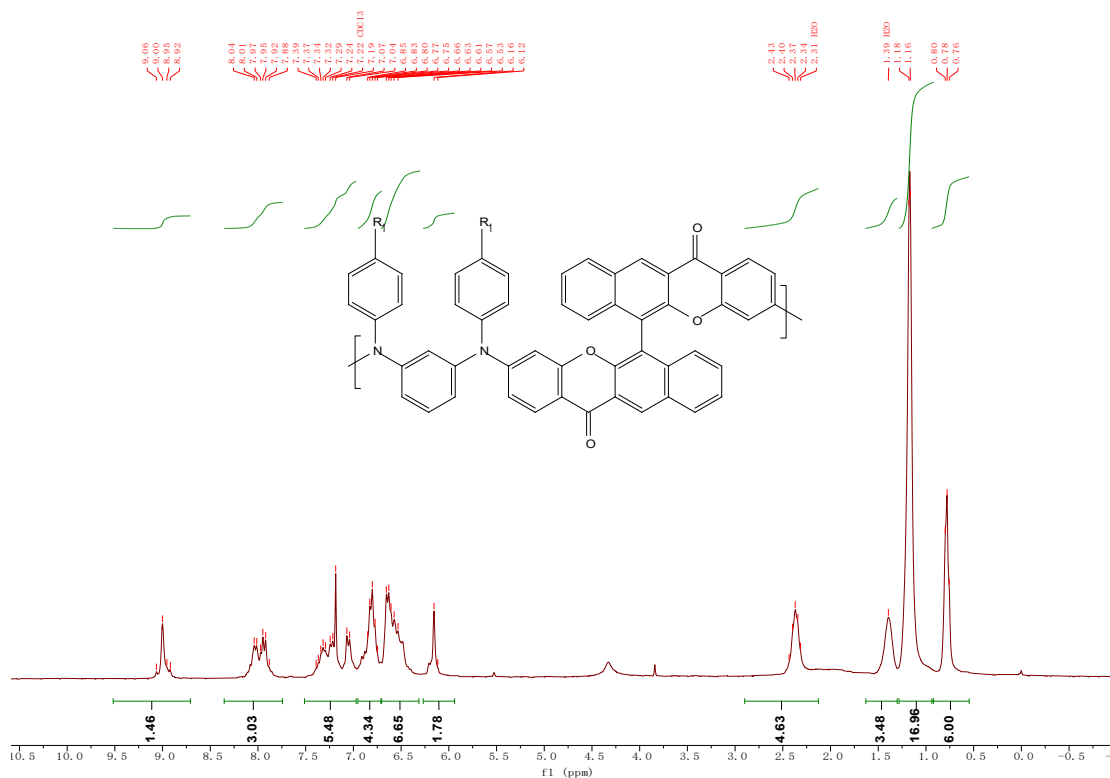

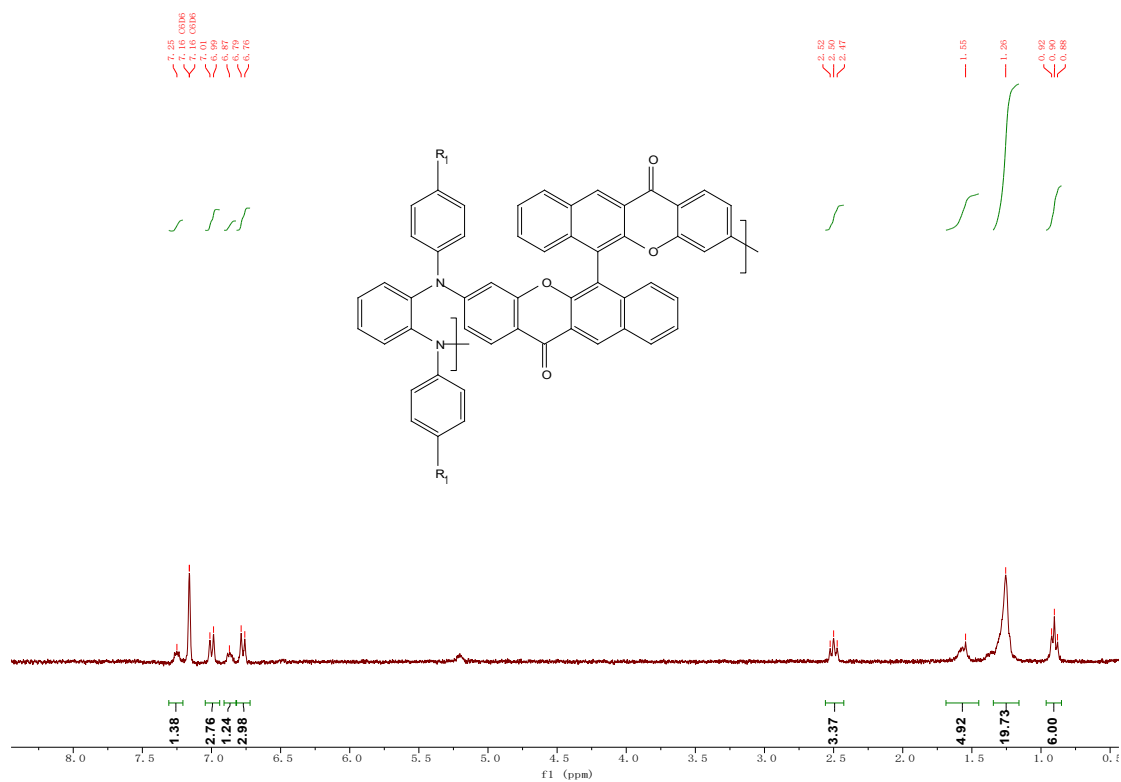

**Figure S25.** <sup>1</sup>H NMR spectrum of P3 (300 MHz, Chloroform-d).

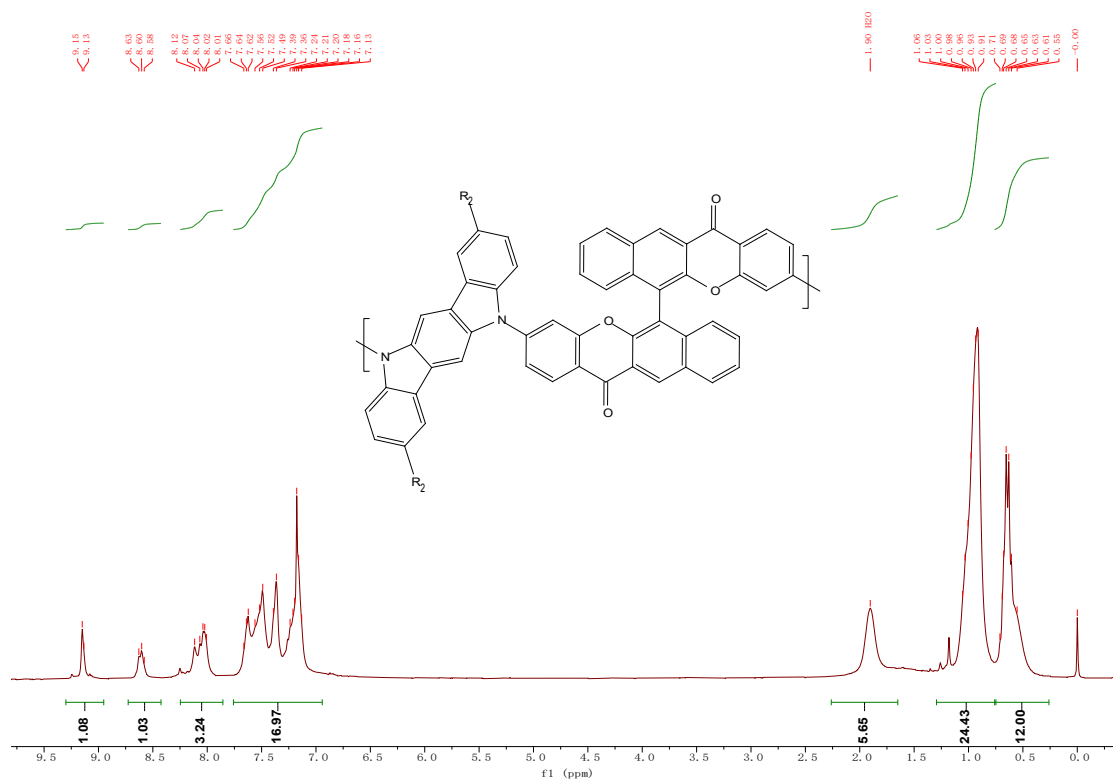

**Figure S26.** <sup>1</sup>H NMR spectrum of P4 (300 MHz, Chloroform-d).

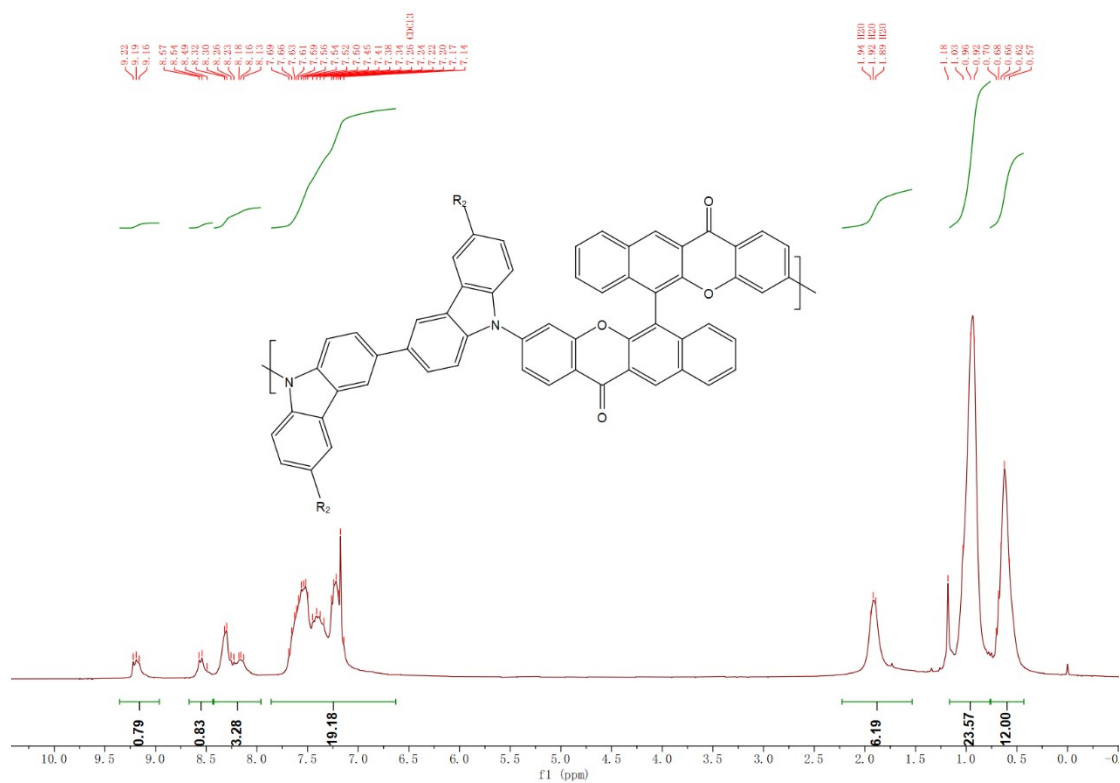

**Figure S27.** <sup>1</sup>H NMR spectrum of P5 (300 MHz, Chloroform-*d*).

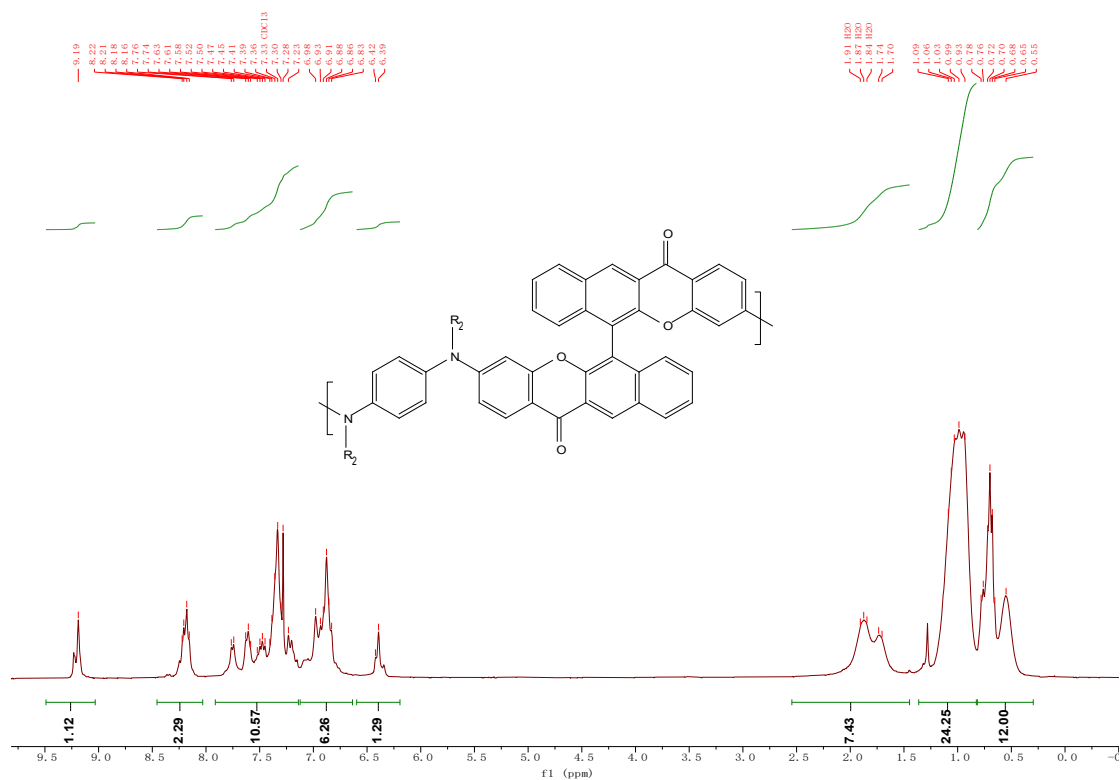

**Figure S28.** <sup>1</sup>H NMR spectrum of P6 (300 MHz, Chloroform-*d*).

## 8. References

1. M. Kukino, J. Kuwabara, K. Matsuishi, T. Fukuda and T. Kanbara, *Chem. Lett.*, 2010, **39**, 1248-1250.
2. S. Ameen, J. Lee, H. Han, M. C. Suh and C. Lee, *RSC Adv.*, 2016, **6**, 33212-33220.
